# Supplementary material for: Ultralong organic luminogens with color-tunability via intermolecular through-space charge-transfer characters
Source: Royal Society of Chemistry journal article supplement (doi:10.1039/d0tc00738b), 2020-01-01
Supplement: d0tc00738b1.pdf [file d0tc00738b1.pdf]

## Supporting Information

### **Ultralong Organic Luminogens with Color-Tunability *via* Intermolecular Through-Space Charge-Transfer Characters**

Yanju Luo,<sup>ab</sup> Zhenguo Pang,<sup>a</sup> Chuan Li,<sup>a</sup> Kuan Chen,<sup>a</sup> Xujun Zheng,<sup>\*a</sup> Yan Huang<sup>a</sup> and Zhiyun Lu<sup>\*a</sup>

<sup>a</sup> Key Laboratory of Green Chemistry and Technology (Ministry of Education), College of Chemistry, Sichuan University, Chengdu 610064 (P. R. China). E-mail: [zhengxujun2019@gmail.com](mailto:zhengxujun2019@gmail.com); [luzhiyun@scu.edu.cn](mailto:luzhiyun@scu.edu.cn);

<sup>b</sup> Analytical & Testing Center, Sichuan University, Chengdu 610064 (P. R. China).

## 1) Experimental details

### General Information

**Materials.** Unless otherwise described, all reagents and anhydrous solvents were purchased from commercial sources and used without further purification. All the solvents used in photophysical measurements were of analytical grades and freshly distilled prior to use. Carbazole (**Cz**) and 9,9-dimethylthioxanthene *S,S*-dioxide (**SO**) were purified through recrystallization from ethanol before used.

**General method.**  $^1\text{H}$  NMR and  $^{13}\text{C}$  NMR spectra were recorded on a Bruker AVANCE II-400 MHz spectrometer at 400 and 100 MHz in  $\text{CDCl}_3$ , respectively. Tetramethylsilane (TMS) was used as an internal standard. All chemical shift data were reported in the standard  $\delta$  notation of parts per million. Splitting patterns were designed as follows: s (singlet), d (doublet), t (triplet) and m (multiplet). High resolution MS spectra were measured on a Q-TOF Premier ESI mass spectrometer (Micromass, Manchester, UK). The purity of target molecules was determined by high-performance liquid chromatography (Perkin-Elmer Flexar LC). Melting points were determined by a SG ERR melting point instrument without further correction. UV-vis spectra were measured on a Shimadzu UV-3600 spectrophotometer equipped with an integrating sphere. Absorption spectra for the solution samples were collected on a solution sample rack with quartz cell. Absorption spectra for the film and crystal samples were measured from an integrating sphere through reflective mode, in which the sample was located at the exit of the integrating sphere and a blank barium sulfate tablet was used to establish a zero baseline. Steady-state photoluminescence excitation and emission spectra were recorded on a Horiba Jobin Yvon Fluoromax-4 fluorescence spectrophotometer. Phosphorescence spectra of the solution and doped PMMA film samples at 77 K were measured on a Hitachi F-7000 fluorescence spectrophotometer, and phosphorescence spectra of the crystal samples at room temperature were measured on a Horiba Jobin Yvon Fluorolog-3 fluorescence spectrophotometer. Photoluminescence efficiency was collected on a Hamamatsu UV-NIR (C13534) absolute PL quantum yield spectrometer. Transient photoluminescence decay characteristics of the crystal samples were recorded on a Horiba Jobin Yvon FluoroHub-B equipped with a single photon counting controller. Single crystal X-ray diffraction data was obtained on a Xcalibur E X-ray single crystal diffractometer equipped with a graphite monochromator  $\text{Mo-K}\alpha$  ( $\lambda = 0.71073 \text{ \AA}$ ) radiation. Two-photon excited PL emission spectrum and corresponding photograph were recorded on a two-photon confocal

microscope (AIR MP+, Nikon, Japan). Photographs of the crystalline samples under UV and visible lights using a portable UV lamp (365 nm) and a blue lamp (420 nm) were taken by a mobile phone. Single crystal samples of **CzSO** and  **$\beta$ -CbSO** were both obtained by slow evaporation of saturated solution from mixed solvents (dichloromethane and ethanol) under room temperature. The crystallographic data for **CzSO** and  **$\beta$ -CbSO** reported here have been deposited in the Cambridge Structural Database with CCDC numbers of 1959108 and 1959109, respectively.

**Computational method.** Quantum chemistry calculations were performed on monomeric and dimeric **CzSO** and  **$\beta$ -CbSO** using Gaussian 09 software package with PBE0 functional and 6-311g (d) basis set. All calculation models for monomeric and dimeric **CzSO** and  **$\beta$ -CbSO** were extracted from their corresponding single crystal structures. To identify a better calculation method for these systems, the calculated vertical excitation energy data of monomeric **CzSO** and  **$\beta$ -CbSO** were compared with the corresponding experimental data derived from their maximal absorption in acetonitrile. The results indicated that the maximal absorption is 324 nm (3.83 eV) for **CzSO** and 336 nm (3.69 eV) for  **$\beta$ -CbSO** in acetonitrile; while the corresponding calculated vertical excitation energy data by PBE0 function is 327 nm (3.79 eV) for **CzSO** and 311 nm (3.99 eV) for  **$\beta$ -CbSO**. Since the calculated vertical excitation energy data are in good agreement with the experimental observations, the computation results should be reliable. Kohn-Sham frontier orbital analysis was subsequently performed to elucidate the mechanisms of possible singlet-triplet intersystem crossing (ISC), intermolecular charge transfer, and through-space conjugation as well in dimeric aggregates of **CzSO** and  **$\beta$ -CbSO**.

**Preparation of droplet film sample of CzSO, and thermally fused film samples of CzSO and Cz:SO blended mixture.** The droplet-film sample of **CzSO** was obtained by dropping the **CzSO** toluene solution (10 mg mL<sup>-1</sup>) on a quartz substrate followed by slowly evaporation of the solvent at room temperature. For the thermally fused film sample of **CzSO**, it was obtained by heating a flask containing **CzSO** crystals and a quartz substrate at 260 °C to observe the complete melting of **CzSO** (Mp: 230 °C) under a nitrogen atmosphere, followed by slowly cooling down the flask to room temperature. For the thermally fused film sample of **Cz:SO** blended mixture, it was obtained by heating a flask containing a mixture of crystalline **Cz** and **SO** (1:1 in molar ratio) and a quartz substrate at 260 °C to observe the complete

melting of **Cz** (Mp: 245 °C) and **SO** (Mp: 160 °C) under a nitrogen atmosphere, followed by slowly cooling down the flask to room temperature.

### Synthetic procedures and structural characterization data

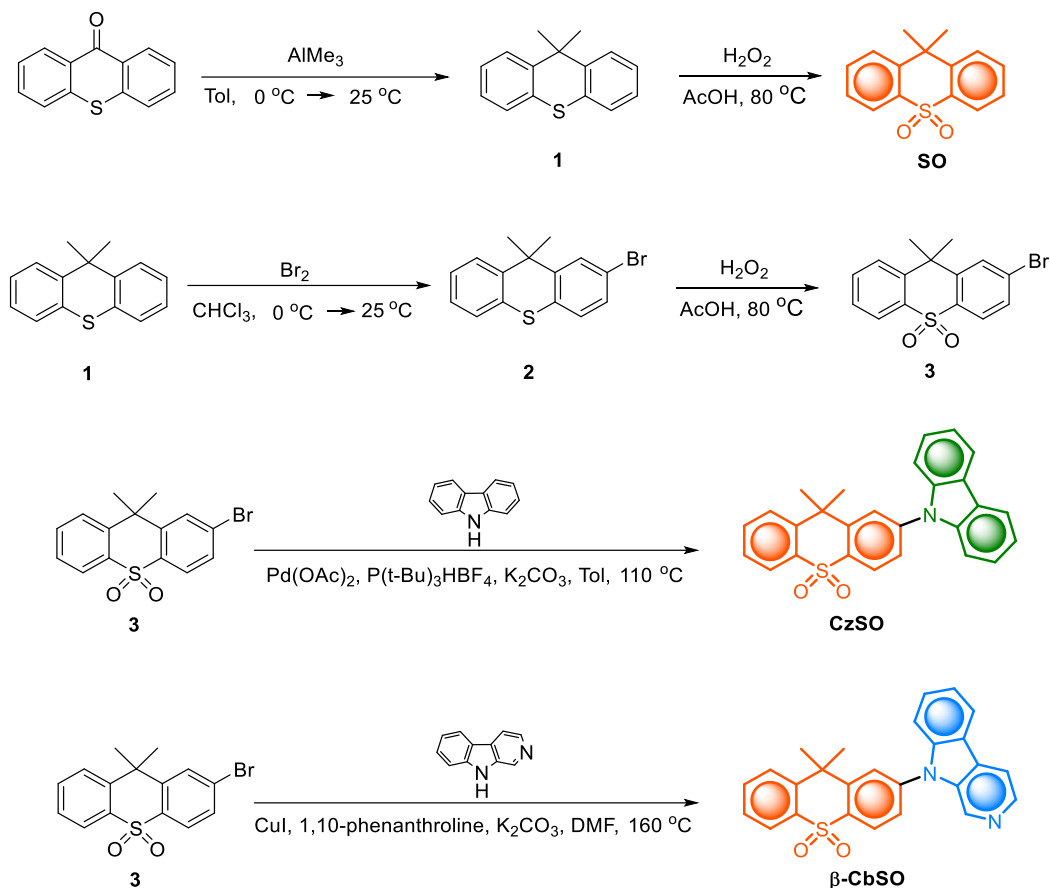

**Scheme S1.** Synthetic route to compounds **SO**, **CzSO** and  $\beta$ -**CbSO**.

Intermediates **1** and **2** were synthesized according to reported procedures.<sup>[1]</sup>

#### Synthesis of 2-bromo-9,9-dimethyl-9H-thioxanthene 10,10-dioxide (**3**)<sup>[1]</sup>

A solution of intermediate **2** (6.0 g, 19.70 mmol) in acetic acid (140 mL) was stirred at  $80\text{ }^\circ\text{C}$  for 0.5 h, then  $\text{H}_2\text{O}_2$  (84 mL, 30 wt.% in  $\text{H}_2\text{O}$ ) was added dropwise via a dropping funnel. After the addition, the mixture was refluxed for 2 h. After being cooled down to room temperature, the reaction mixture was cooled down, then poured into 60 mL water and extracted with  $\text{CH}_2\text{Cl}_2$  (40 mL  $\times$  3). After the solvent was removed, the residue was purified using column chromatography on silica gel employing PE/ $\text{CH}_2\text{Cl}_2$  (1/1) as an eluent to afford a white solid. Yield: 94%. Mp: 157-158 °C.  $^1\text{H}$  NMR (400 MHz,  $\text{CDCl}_3$ )  $\delta$  (ppm): 8.18 (dd,  $J_1$

= 7.6 Hz,  $J_2 = 0.8$  Hz, 1 H), 8.05 (d,  $J = 8.4$  Hz, 1H), 7.89 (d,  $J = 1.6$  Hz, 1H), 7.74 (d,  $J = 8.0$  Hz, 1H), 7.66 (dd,  $J_1 = 8.4$  Hz,  $J_2 = 2.0$  Hz, 1H), 7.64-7.58 (m, 1H), 7.52 (t,  $J = 7.6$  Hz, 1H), 1.88 (s, 6H).

### Synthesis of 9,9-dimethyl-9H-thioxanthene 10,10-dioxide (SO)

A solution of intermediate **1** (2.0 g, 8.84 mmol) in acetic acid (20 mL) was stirred at 80 °C for 0.5 h, then H<sub>2</sub>O<sub>2</sub> (28 mL, 30 wt.% in H<sub>2</sub>O) was added dropwise via a dropping funnel. After the addition, the mixture was refluxed for 2 h. After being cooled down to room temperature, the precipitation was collected by filtration, and washed with water to afford the product. After being dried at 70 °C overnight, the product was obtained as a white solid. The white needle crystal was obtained by recrystallization in ethanol. Yield: 94%. Mp: 160-162 °C. <sup>1</sup>H NMR (400 MHz, CDCl<sub>3</sub>)  $\delta$  (ppm): 8.20 (dd,  $J_1 = 7.6$  Hz,  $J_2 = 1.6$  Hz, 2H), 7.75 (dd,  $J_1 = 8.0$  Hz,  $J_2 = 0.8$  Hz, 2H), 7.60 (m, 2H), 7.51 (td,  $J_1 = 8.0$  Hz,  $J_2 = 1.2$  Hz, 2H), 1.89 (s, 6 H).

### Synthesis of 2-(9H-carbazol-9-yl)-9,9-dimethyl-9H-thioxanthene 10,10-dioxide (CzSO)

A flask was charged with 9H-carbazole (0.16 g, 0.98 mmol), intermediate **3** (0.30 g, 0.89 mmol), Pd(OAc)<sub>2</sub> (4.0 mg, 0.018 mmol), P(*t*-Bu)<sub>3</sub>·HBF<sub>4</sub> (10.3 mg, 0.036 mmol), K<sub>2</sub>CO<sub>3</sub> (0.25 g, 1.8 mmol) and dry toluene (6 mL), and the reaction mixture was stirred at 110 °C for 24 h under argon. Then the reaction mixture was cooled down, then poured into 30 mL of water and extracted with CH<sub>2</sub>Cl<sub>2</sub> (20 mL  $\times$  3). The resultant organic phase was washed with brine, and dried over anhydrous Na<sub>2</sub>SO<sub>4</sub>. After the solvent was removed in vacuum, the residue was purified using column chromatography on silica gel employing PE/CH<sub>2</sub>Cl<sub>2</sub> (1/1) as the eluent to afford a white solid. Yield: 85%. Mp: 230-231 °C. <sup>1</sup>H NMR (400 MHz, CDCl<sub>3</sub>)  $\delta$  (ppm): 8.44 (d,  $J = 8.0$  Hz, 1H), 8.26 (dd,  $J_1 = 7.6$  Hz,  $J_2 = 1.2$  Hz, 1H), 8.17-8.15 (m, 2H), 7.99 (d,  $J = 1.6$  Hz, 1H), 7.80-7.74 (m, 2H), 7.65 (td,  $J_1 = 7.6$  Hz,  $J_2 = 1.6$  Hz, 1H), 7.56 (td,  $J_1 = 7.6$  Hz,  $J_2 = 0.8$  Hz, 1H), 7.47-7.41 (m, 4H), 7.36-7.32 (m, 2H), 1.94 (s, 6H). <sup>13</sup>C NMR (100 MHz, CDCl<sub>3</sub>)  $\delta$  (ppm): 148.3, 145.4, 141.9, 140.2, 136.7, 135.2, 133.1, 127.8, 126.4, 126.4, 125.8, 125.6, 124.4, 123.9, 120.9, 120.6, 109.5, 39.6, 31.0. HRMS (ESI)  $m/z$  for C<sub>27</sub>H<sub>21</sub>NO<sub>2</sub>SNa<sup>+</sup> [M + Na]<sup>+</sup> Calcd.: 446.1185, found: 446.1179.

### Synthesis of 9,9-dimethyl-2-(9H-pyrido[3,4-*b*]indol-9-yl)-9H-thioxanthene 10,10-dioxide ( $\beta$ -CbSO)

A flask was charged with 9H-pyrido[3,4-*b*]indole (226 mg, 1.34 mmol), intermediate **3** (378 mg, 1.12 mmol), CuI (43 mg, 0.22 mmol), 1,10-phenanthroline (44 mg, 0.22 mmol), K<sub>2</sub>CO<sub>3</sub> (619 mg, 4.5 mmol) and dry DMF (5 mL), and the reaction mixture was stirred at 160 °C for

34 h under argon. The reaction mixture was cooled down, then poured into 15 mL brine, the precipitate was filtered under reduced pressure, then was subject to column chromatography (eluent: Tol/DCM/MeOH = 20/20/1) to afford a yellow solid. Yield: 61%. Mp: 269-270 °C.  $^1\text{H}$  NMR (400 MHz,  $\text{CDCl}_3$ )  $\delta$  (ppm): 8.91 (s, 1H), 8.58 (d,  $J = 5.6$  Hz, 1H), 8.48 (d,  $J = 8.4$  Hz, 1H), 8.28-8.23 (m, 2H), 8.07 (d,  $J = 5.2$  Hz, 1H), 8.01 (d,  $J = 2.0$  Hz, 1H), 7.81-7.78 (m, 2H), 7.69-7.56 (m, 3H), 7.52 (d,  $J = 8.4$  Hz, 1H), 7.42 (t,  $J = 8.0$  Hz, 1H), 1.96 (s, 6H).  $^{13}\text{C}$  NMR (100 MHz,  $\text{CDCl}_3$ )  $\delta$  (ppm): 148.7, 145.3, 141.1, 140.8, 140.3, 136.5, 136.0, 133.3, 132.3, 130.0, 129.4, 127.9, 126.7, 125.8, 125.4, 124.5, 123.8, 122.2, 122.0, 121.7, 114.9, 110.3, 39.7, 31.1. HRMS (ESI)  $m/z$  for  $\text{C}_{26}\text{H}_{20}\text{N}_2\text{O}_2\text{SH}^+$   $[\text{M}+\text{H}]^+$  Calcd.: 425.1318, found 425.1298;  $\text{C}_{26}\text{H}_{20}\text{N}_2\text{O}_2\text{SNa}^+$   $[\text{M} + \text{Na}]^+$  Calcd.: 447.1138, found: 446.1081.

## 2) Characterization results

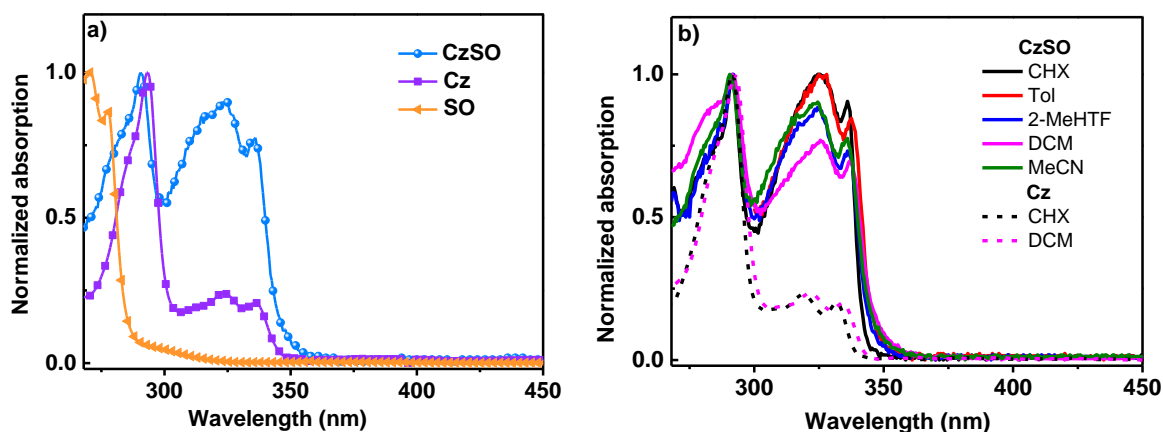

**Figure S1.** a) Normalized absorption spectra of **CzSO**, **Cz** and **SO** in dilute MeCN solution. b) Normalized absorption spectra of **CzSO** and **Cz** in solvents with different polarity. CHX: cyclohexane; Tol: toluene; 2-MeTHF: 2-methyltetrahydrofuran; DCM: dichloromethane; MeCN: acetonitrile.

The absorption onset of **CzSO** solution is slightly red-shifted than that of **Cz**, indicative of the presence of weak electron coupling between **Cz** and **SO** moieties in **CzSO** in the ground state.

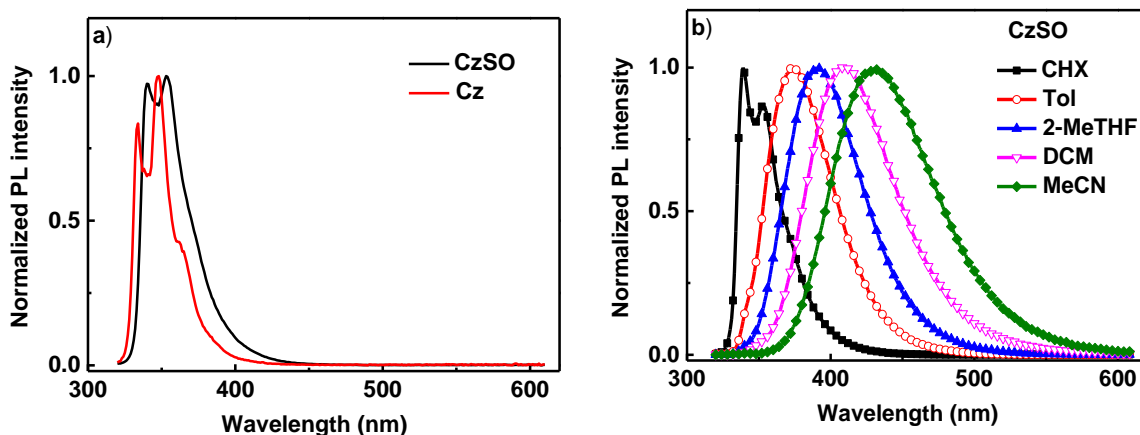

**Figure S2.** a) Normalized photoluminescence (PL) emission spectra of **CzSO** and **Cz** in CHX solution. b) Normalized PL emission spectra of **CzSO** in solvents with different polarity under ambient conditions ( $\lambda_{\text{ex}} = 310 \text{ nm}$ ,  $10^{-5} \text{ M}$ ).

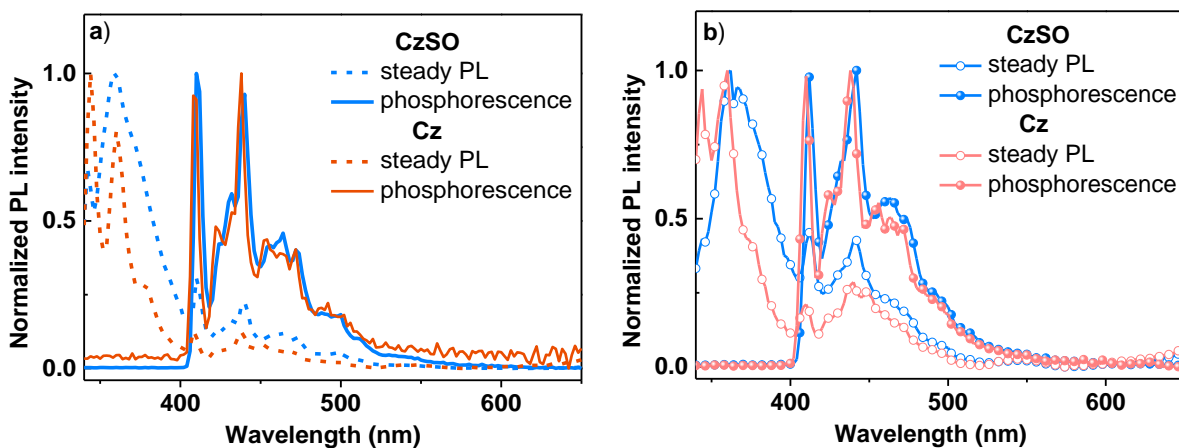

**Figure S3.** Steady-state PL spectra and phosphorescence spectra (40 Hz delayed) of **CzSO** and **Cz** at 77 K. a) In 2-MeTHF solution ( $10^{-5} \text{ M}$ ,  $\lambda_{\text{ex}} = 330 \text{ nm}$ ). b) In 1 wt.-%-doped PMMA film ( $\lambda_{\text{ex}} = 330 \text{ nm}$ ).

According to the phosphorescence spectrum of **Cz**, the triplet energy level of isolated **Cz** is determined to be 3.02 eV in both 2-MeTHF and PMMA matrix.

**Table S1.** Structure data of **CzSO** and  **$\beta$ -CbSO** single crystals.

| Name                                                         | <b>CzSO</b>                                                                  | <b><math>\beta</math>-CbSO</b>                                               |
|--------------------------------------------------------------|------------------------------------------------------------------------------|------------------------------------------------------------------------------|
| Empirical formula                                            | C <sub>27</sub> H <sub>21</sub> NO <sub>2</sub> S                            | C <sub>26</sub> H <sub>20</sub> N <sub>2</sub> O <sub>2</sub> S              |
| Formula weight                                               | 423.51                                                                       | 424.50                                                                       |
| Temperature (K)                                              | 293.15                                                                       | 293.15                                                                       |
| Crystal system                                               | monoclinic                                                                   | monoclinic                                                                   |
| Space group                                                  | P2 <sub>1</sub> /c                                                           | P2 <sub>1</sub> /c                                                           |
| <i>a</i> (Å)                                                 | 18.1383(19)                                                                  | 8.5006(4)                                                                    |
| <i>b</i> (Å)                                                 | 7.9990(6)                                                                    | 31.1202(15)                                                                  |
| <i>c</i> (Å)                                                 | 15.0009(15)                                                                  | 7.6409(4)                                                                    |
| $\alpha$ (°)                                                 | 90                                                                           | 90                                                                           |
| $\beta$ (°)                                                  | 106.602(11)                                                                  | 90.895(5)                                                                    |
| $\gamma$ (°)                                                 | 90                                                                           | 90                                                                           |
| Volume (Å <sup>3</sup> )                                     | 2085.7(4)                                                                    | 2021.08(17)                                                                  |
| <i>Z</i>                                                     | 4                                                                            | 4                                                                            |
| Density (g/cm <sup>3</sup> )                                 | 1.349                                                                        | 1.395                                                                        |
| $\mu$ (mm <sup>-1</sup> )                                    | 0.180                                                                        | 0.188                                                                        |
| <i>F</i> (000)                                               | 888.0                                                                        | 888.0                                                                        |
| Crystal size (mm <sup>3</sup> )                              | 0.35 × 0.3 × 0.25                                                            | 0.4 × 0.35 × 0.25                                                            |
| Radiation                                                    | MoK $\alpha$ ( $\lambda$ = 0.71073)                                          | MoK $\alpha$ ( $\lambda$ = 0.71073)                                          |
| 2 $\Theta$ range for data collection/°                       | 6.238 to 58.13                                                               | 5.94 to 52.744                                                               |
| Index ranges                                                 | -22 ≤ <i>h</i> ≤ 24, -10 ≤ <i>k</i> ≤ 7, -20 ≤ <i>l</i> ≤ 20                 | -10 ≤ <i>h</i> ≤ 9, -38 ≤ <i>k</i> ≤ 31, -9 ≤ <i>l</i> ≤ 9                   |
| Reflections collected                                        | 10586                                                                        | 10730                                                                        |
| Independent reflections                                      | 4803 [ <i>R</i> <sub>int</sub> = 0.0222, <i>R</i> <sub>sigma</sub> = 0.0381] | 4032 [ <i>R</i> <sub>int</sub> = 0.0225, <i>R</i> <sub>sigma</sub> = 0.0335] |
| Data/restraints/parameters                                   | 4803/0/282                                                                   | 4032/0/282                                                                   |
| Goodness-of-fit on <i>F</i> <sup>2</sup>                     | 1.027                                                                        | 1.029                                                                        |
| Final <i>R</i> indexes [ <i>I</i> ≥ 2 $\sigma$ ( <i>I</i> )] | <i>R</i> <sub>1</sub> = 0.0487, <i>wR</i> <sub>2</sub> = 0.1135              | <i>R</i> <sub>1</sub> = 0.0460, <i>wR</i> <sub>2</sub> = 0.1030              |
| Final <i>R</i> indexes [all data]                            | <i>R</i> <sub>1</sub> = 0.0770, <i>wR</i> <sub>2</sub> = 0.1308              | <i>R</i> <sub>1</sub> = 0.0640, <i>wR</i> <sub>2</sub> = 0.1153              |
| Largest diff. peak/hole (e Å <sup>-3</sup> )                 | 0.29/-0.26                                                                   | 0.29/-0.37                                                                   |

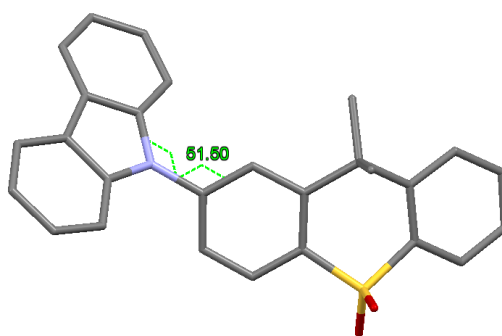**Figure S4.** The molecular structure of **CzSO** extracted from its crystallographic structure. The torsion angle between the **Cz** and **SO** units (51.50°) is indicated by green dashed lines.



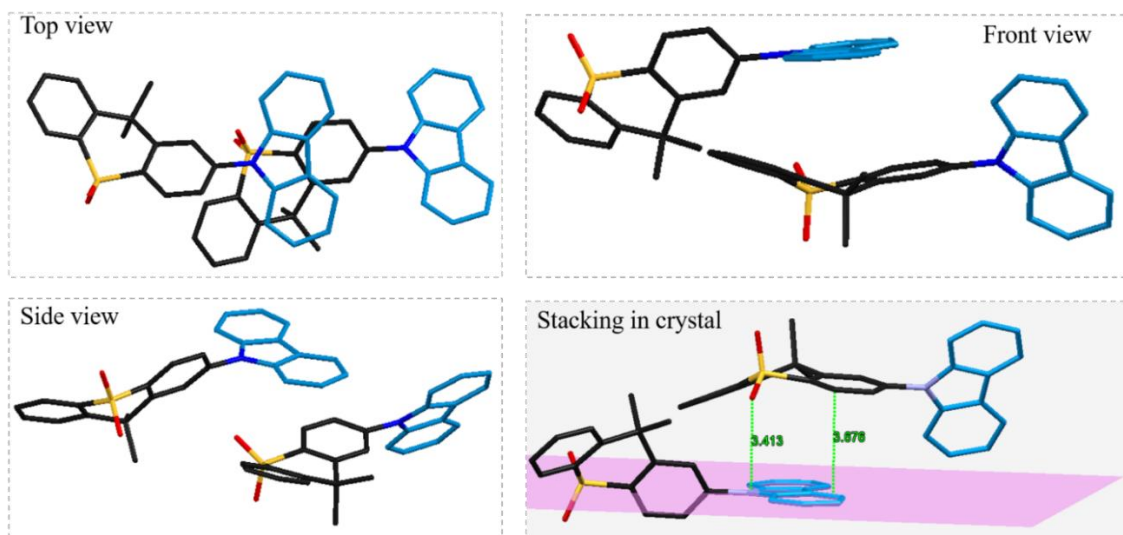

**Figure S5.** Molecular stacking in CzSO single crystal. The shortest distance from SO (oxygen atom) to Cz (nitrogen atom) is 3.413 Å.

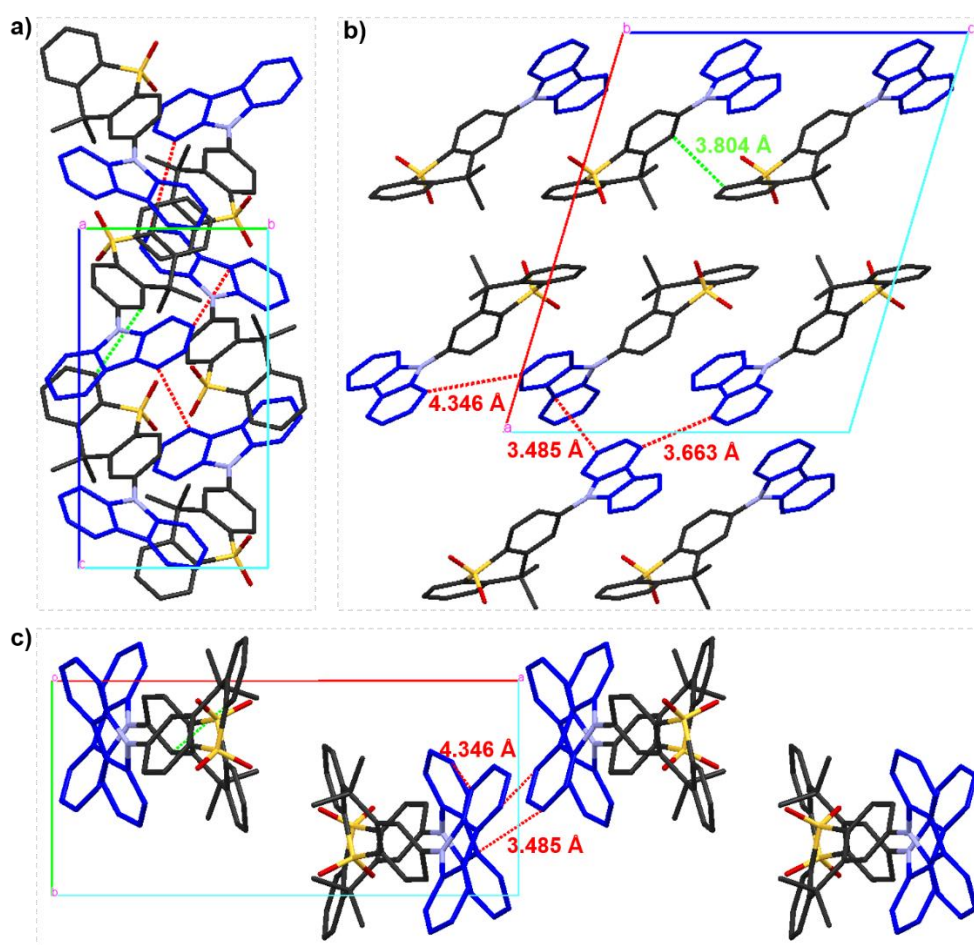

**Figure S6.** Molecular packing in the crystal lattice of CzSO. View down: a) the a-axis; b) the b-axis; and c) the c-axis, respectively.

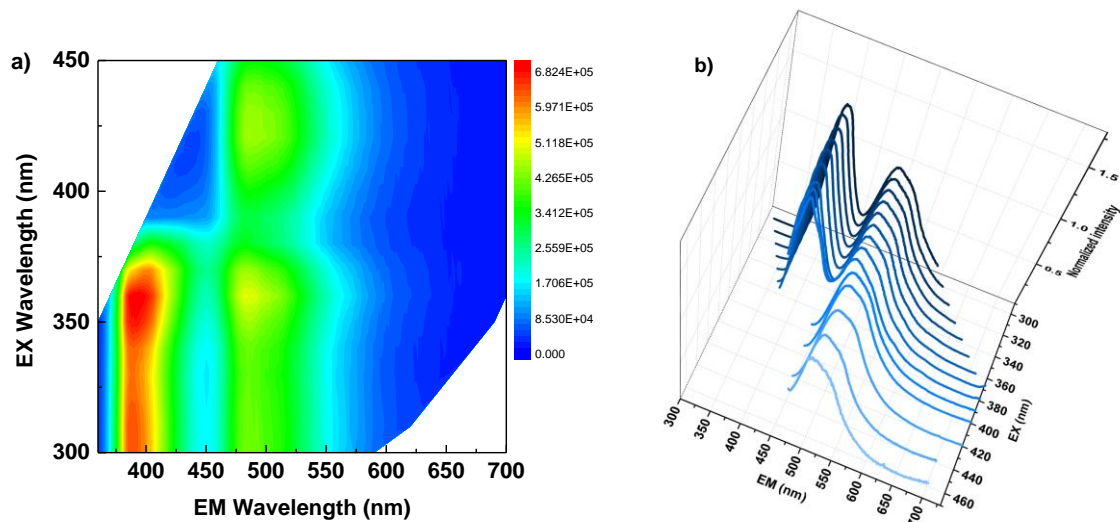

**Figure S7.** a) Steady state excitation-emission mapping of **CzSO** crystal. b) Normalized steady-state PL spectra of **CzSO** crystal upon excitation at 300, 310, 320, 330, 340, 350, 360, 370, 380, 390, 400, 420, 440 and 460 nm under ambient conditions.

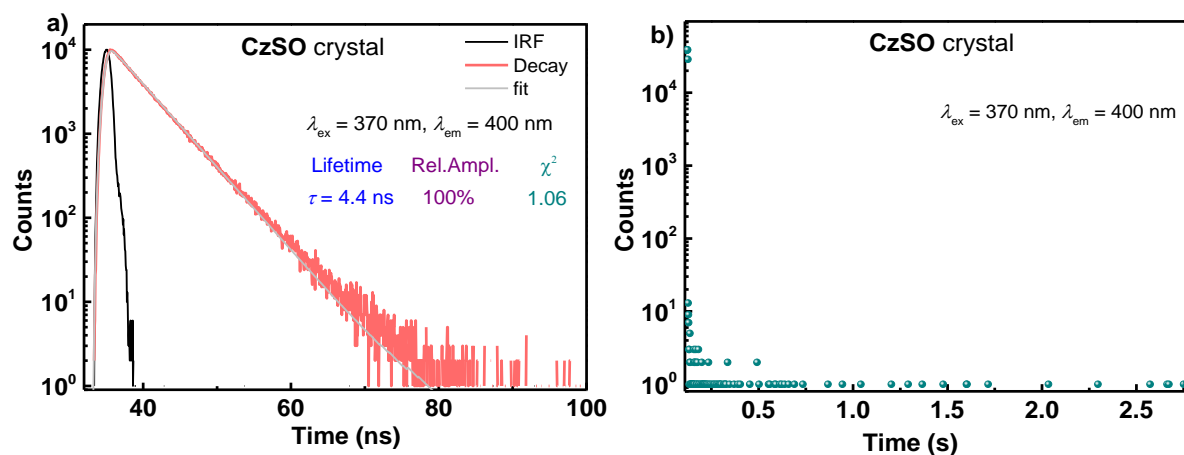

**Figure S8.** PL decay profiles of the higher-energy emission band of crystalline **CzSO** recorded at  $\lambda_{em} = 400$  nm under ambient conditions ( $\lambda_{ex} = 370$  nm) at different time-range windows of: a) 200 ns; and b) 5.6 s. Note that for the higher-energy PL band ( $\lambda_{PL} = 400$  nm), only short-lived species in nanosecond scale could be detected.

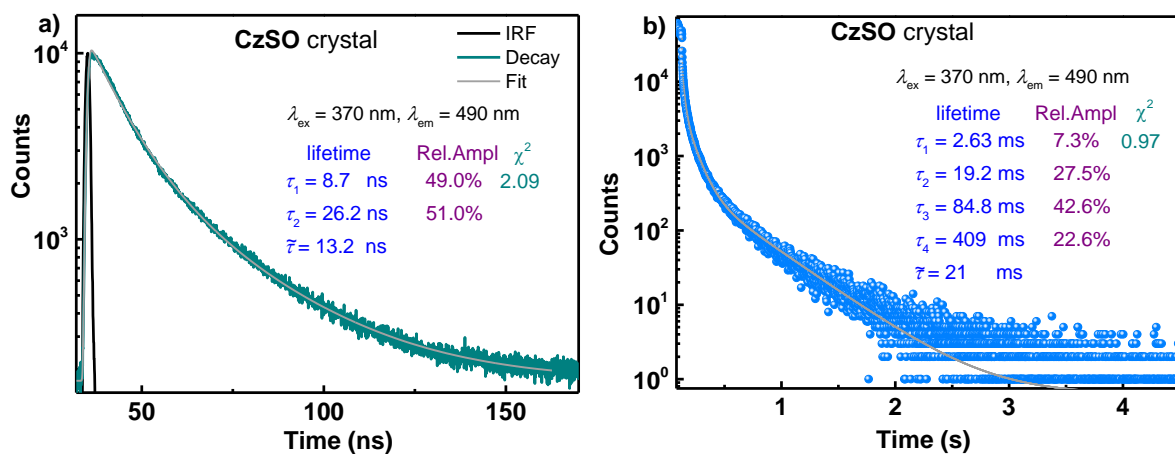

**Figure S9.** PL decay profiles of the lower-energy PL emission band of crystalline **CzSO** recorded at  $\lambda_{\text{em}} = 490 \text{ nm}$  under ambient conditions (UV-light excitation,  $\lambda_{\text{ex}} = 370 \text{ nm}$ ) at different time-range windows of: a) 200 ns; and b) 5.6 s.

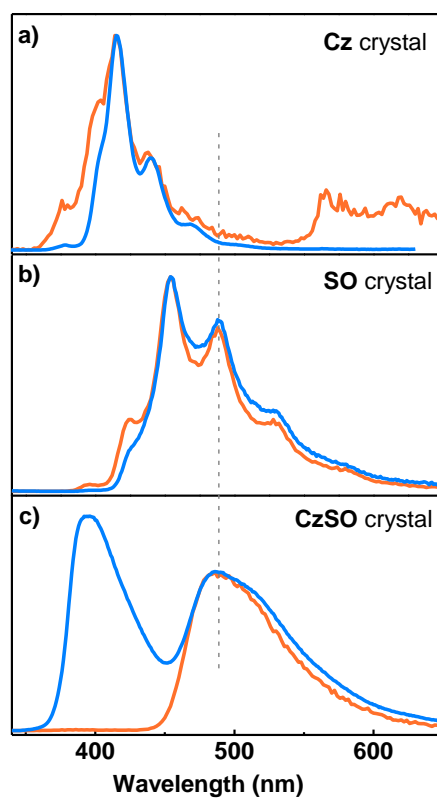

**Figure S10.** Steady state (blue line) and delayed PL spectra (orange line, delay time: 0.1 ms) of: a) **Cz** crystal; b) **SO** crystal, and c) **CzSO** crystal samples. ( $\lambda_{\text{ex}} = 330 \text{ nm}$ ).

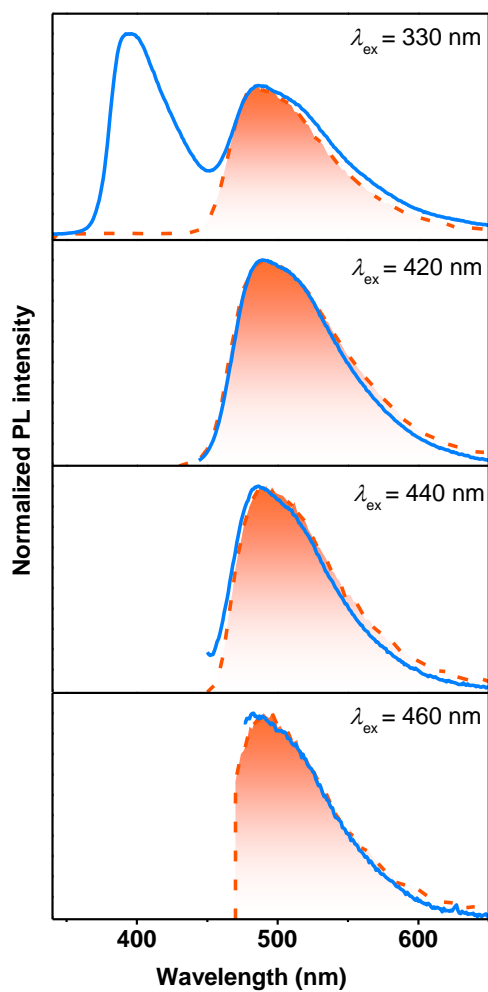

**Figure S11.** Steady state PL spectra (blue line) and delayed PL spectra (orange filled area, delay time: 0.1 ms) of crystalline **CzoSO** under different excitation at 330 nm, 420 nm, 440 nm and 460 nm, respectively.

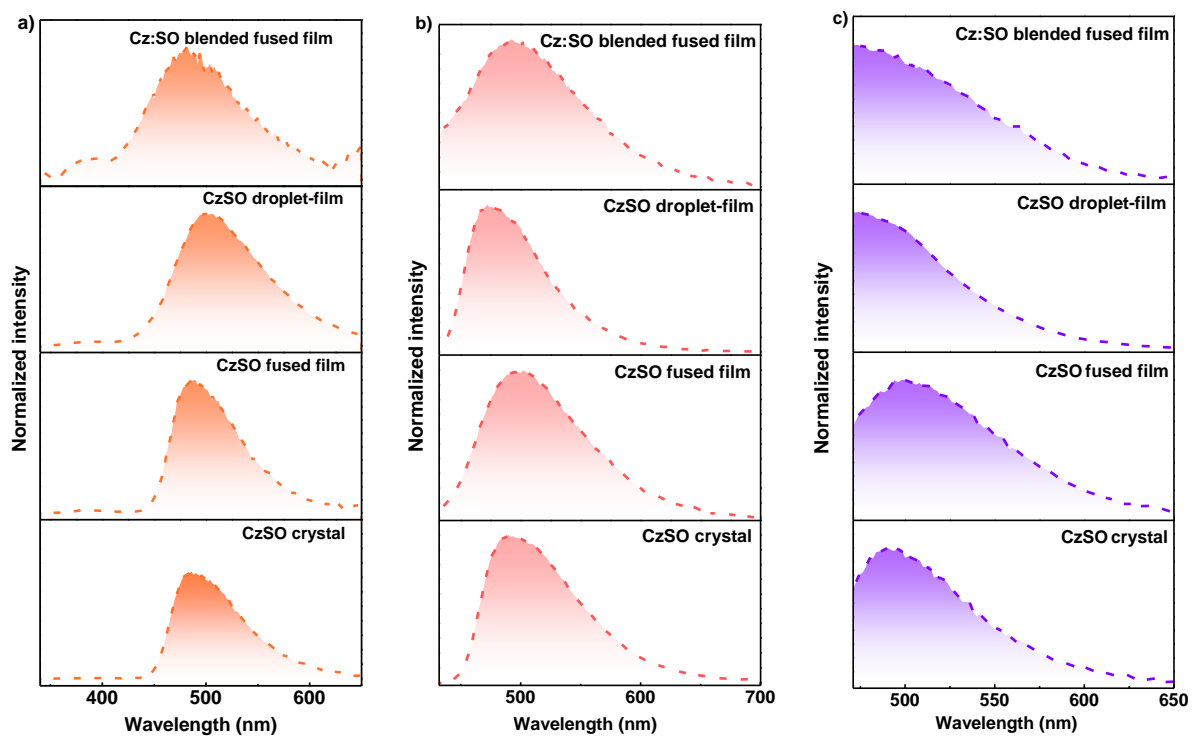

**Figure S12.** Delayed PL spectra (delay time = 0.1 ms) of thermally fused **Cz:SO** blend film, **CzSO** droplet-film, thermally fused **CzSO** film and crystalline **CzSO** under excitation of: a) 330 nm; b) 420 nm; and c) 460 nm.

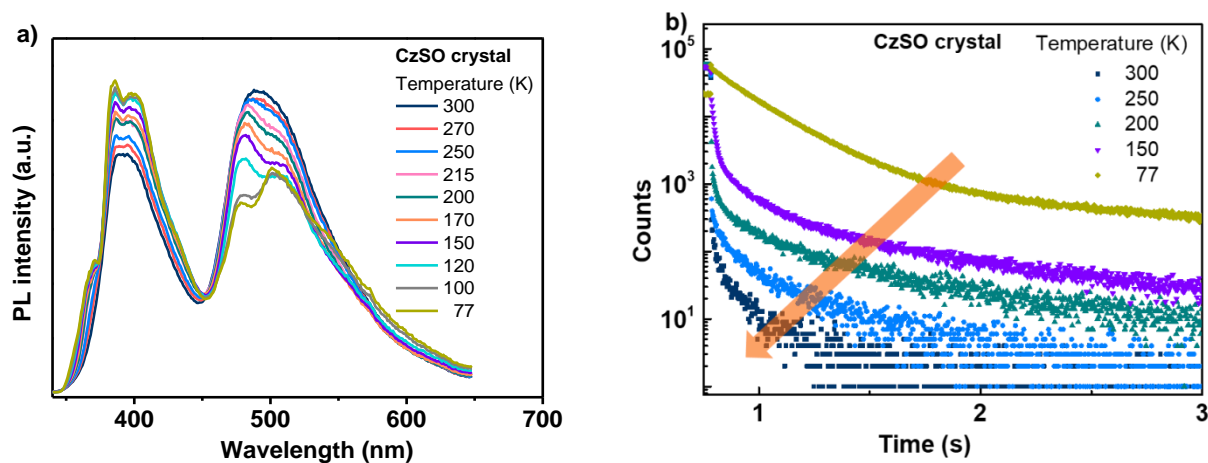

**Figure S13.** a) Temperature-dependent PL spectra of crystalline **CzSO** under  $N_2$  ( $\lambda_{ex} = 330$  nm). b) Temperature-dependent PL decay profiles of crystalline **CzSO** at  $\lambda_{em}$  of 510 nm under  $N_2$  ( $\lambda_{ex} = 355$  nm).

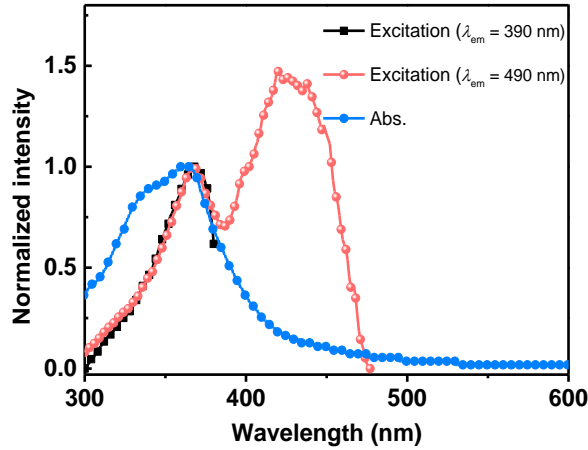

**Figure S14.** Absorption and PL excitation spectra ( $\lambda_{em} = 390, 490$  nm) of crystalline **CzSO** at ambient conditions.

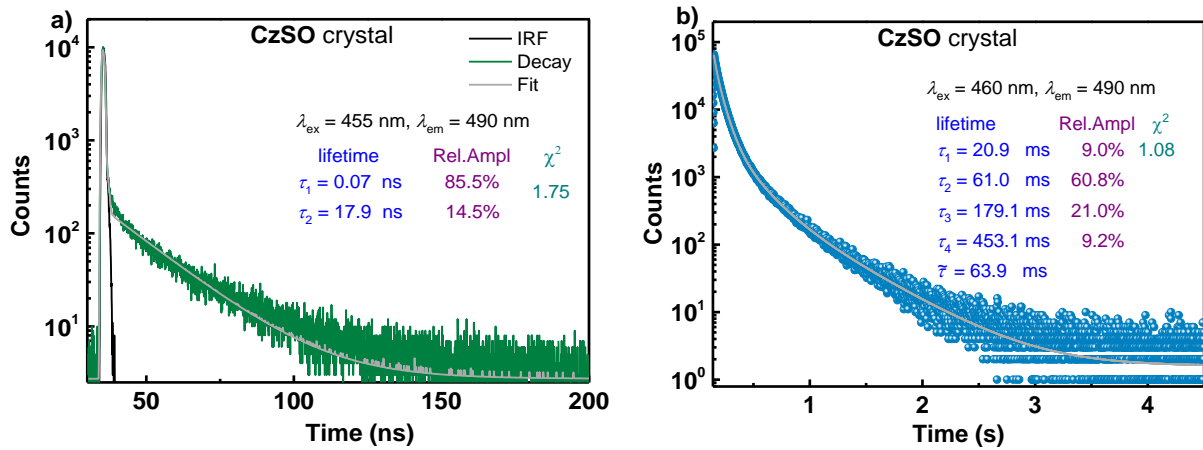

**Figure S15.** PL decay profiles of the lower-energy emission band of crystalline **CzSO** recorded at  $\lambda_{em} = 490$  nm under ambient conditions (visible light excitation,  $\lambda_{ex} = 455$  or  $460$  nm) at different time-range windows of: a) 200 ns; and b) 5.6 s.

After careful comparison between the PL decay and IRF curves, we conjectured that the species with the shortest lifetime ( $\tau < 1$  ns) in Figure S15a may originate from the excitation source (nano-diode 455 nm) due to the light scattering.

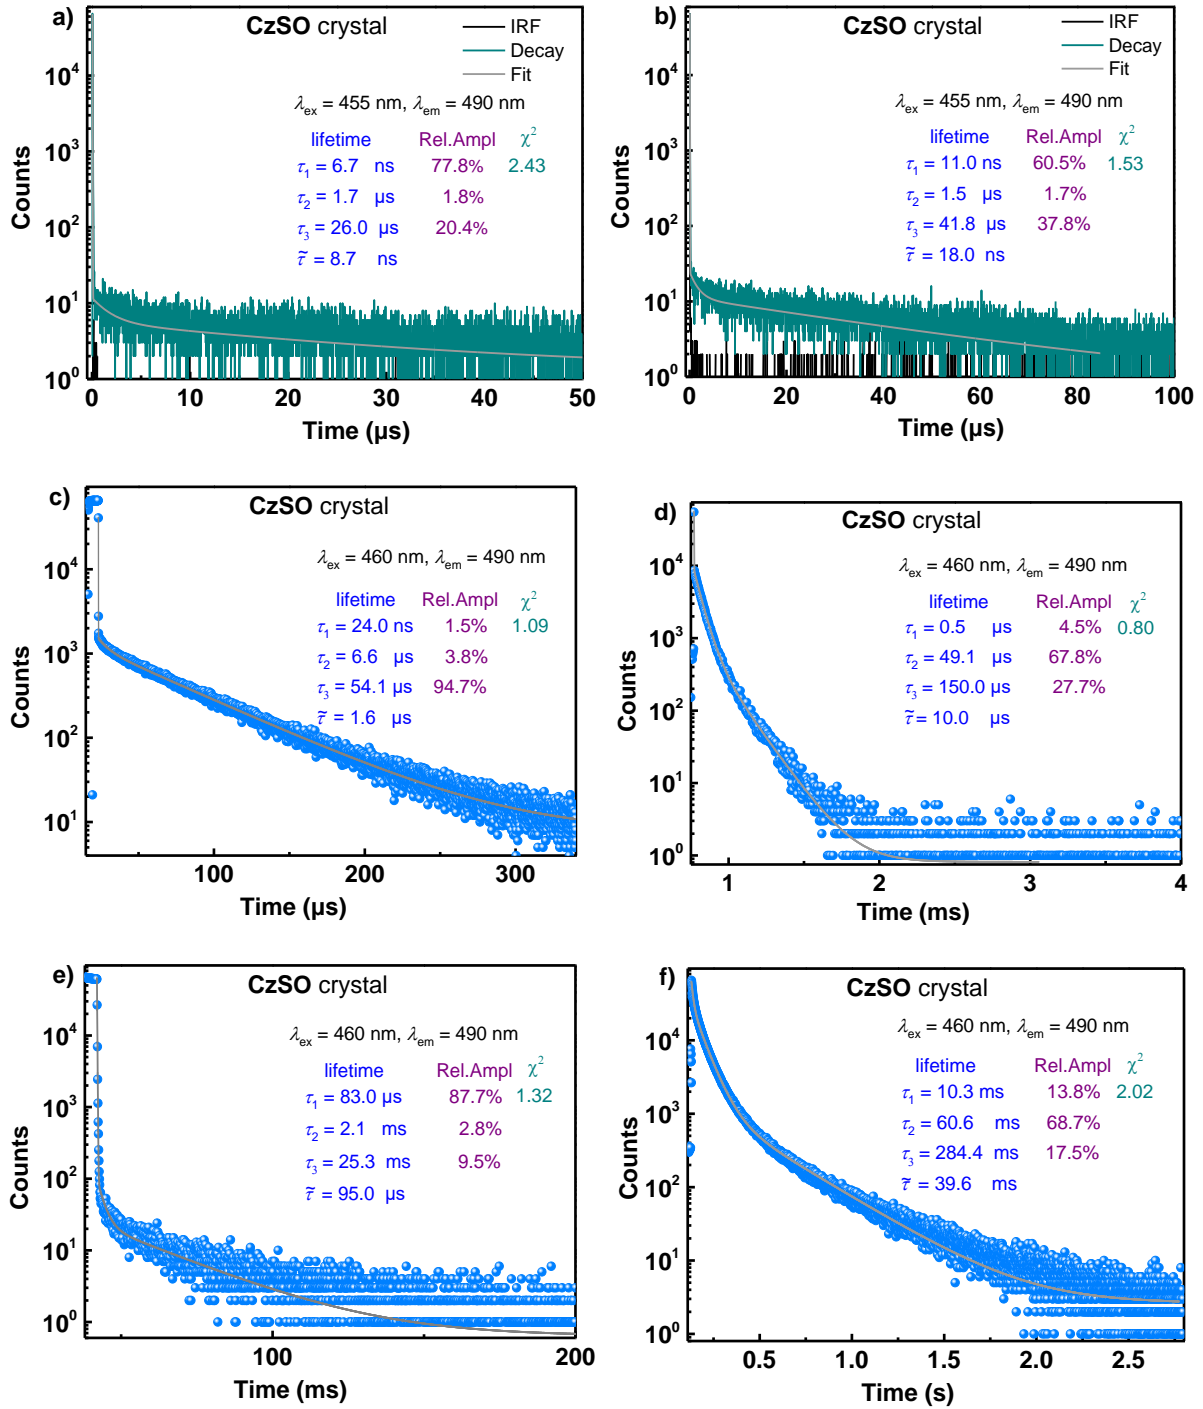

**Figure S16.** PL decay profiles of the lower-energy PL emission band of crystalline **CzSO** recorded at  $\lambda_{\text{em}} = 490 \text{ nm}$  under ambient conditions (visible light excitation,  $\lambda_{\text{ex}} = 455$  or  $460 \text{ nm}$ ) at different time-range windows of: a)  $50 \text{ } \mu\text{s}$ ; b)  $100 \text{ } \mu\text{s}$ ; c)  $340 \text{ } \mu\text{s}$ ; d)  $11 \text{ ms}$ ; e)  $350 \text{ ms}$ ; and f)  $2.8 \text{ s}$ .

According to Figure S9b, crystalline **CzSO** is observed to show four-exponential PL decay functions with lifetimes of  $\tau_1$ ,  $\tau_2$ ,  $\tau_3$  and  $\tau_4$ , respectively. Despite the fact that short-lived

species are all discernable in different measurement time-range windows of 50  $\mu$ s, 100  $\mu$ s, 340  $\mu$ s, 11 ms, 350 ms and 2.8 s, respectively, the lifetime data of these short-lived species in crystalline **CzSO** are always shorter than 20 ms (Figure S16). Therefore, for the PL decay curves shown in Figure S9b (under UV excitation), the two species with shorter lifetime data of  $\tau_1$  (2.6 ms) and  $\tau_2$  (19.2 ms) can be safely assigned to prompt photoluminescence species containing all the short-lived PL components in crystalline **CzSO**, and the other two species with longer lifetime data of  $\tau_3$  (84.8 ms) and  $\tau_4$  (409 ms) should be assigned to long-lived PL species.

Similarly, according to the PL decay curves shown in Figure S15 (under visible excitation), the relatively short-lived species with lifetime of  $\tau_1$  (20.9 ms) should be assigned to the prompt PL species which contains all the short-lived PL components; while the other three lifetime species with longer lifetime data of  $\tau_2$  (61.0 ms),  $\tau_3$  (179.1 ms) and  $\tau_4$  (453.1 ms) should be assigned to the long-lived PL species in crystalline **CzSO**.

**Table S2.** Persistent emission efficiencies of crystalline **CzSO** under ambient conditions.

| Compd.                         | $\lambda_{\text{ex}}$<br>(nm) | $\lambda_{\text{em}}$<br>(nm) | $\varphi_{\text{PL,total}}$<br>(%) | $\varphi_{\text{PL}(490 \text{ or } 460 \text{ nm})}$<br>(%) | $\varphi_{\text{UOL}}$<br>(%) |
|--------------------------------|-------------------------------|-------------------------------|------------------------------------|--------------------------------------------------------------|-------------------------------|
| <b>CzSO</b>                    | 330                           | 396, 490                      | 35                                 | 14.0 <sup>a)</sup>                                           | 9.1                           |
|                                | 440                           | 490                           | -                                  | 28.9                                                         | 26.3                          |
| <b><math>\beta</math>-CbSO</b> | 330                           | 384, 460                      | 4.9                                | 3.0 <sup>a)</sup>                                            | 1.5                           |
|                                | 440                           | 460                           | -                                  | 5.4                                                          | 4.4                           |

<sup>a)</sup> The PL quantum efficiency data ( $\varphi_{\text{PL}}$ ) of the emission band centered at 490 nm for **CzSO** crystals, and 460 nm for  **$\beta$ -CbSO** crystals under UV-light excitation at 330 nm are determined through peak differentiation-imitating analysis from the corresponding steady-state PL spectra.

Using the relative amplitude data ( $f$ ) of the  $\tau_3$  and  $\tau_4$  components, the fraction of UOL ( $\varphi_{\text{UOL}}$ ) in crystalline **CzSO** is extracted from the total  $\varphi_{\text{PL}}$  data according to equation (1). The results indicate that the corresponding  $\varphi_{\text{UOL}}$  data of crystalline **CzSO** is 9.1% under UV excitation, and 26.3% under visible excitation. Similarly, the  $\varphi_{\text{UOL}}$  in crystalline  **$\beta$ -CbSO** is extracted from the corresponding total  $\varphi_{\text{PL}}$  according to equation (1) by using the corresponding  $f$  data of the long-lived emission components in crystalline  **$\beta$ -CbSO** sample.

$$\varphi_{\text{UOL}} = f_{\text{UOL}} \times \varphi_{\text{PL}} \quad (1)$$



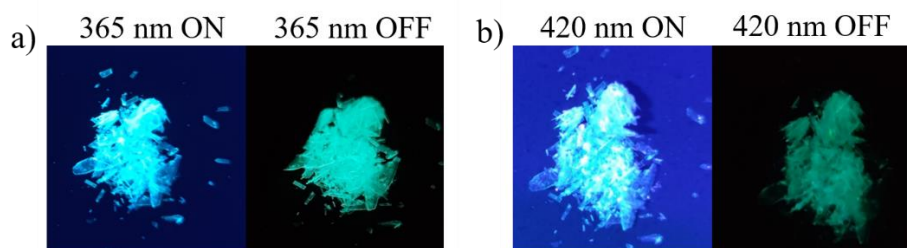

**Figure S17.** Photographs of crystalline CzSO under irradiation ON/OFF of: a) 365 nm; and b) 420 nm.

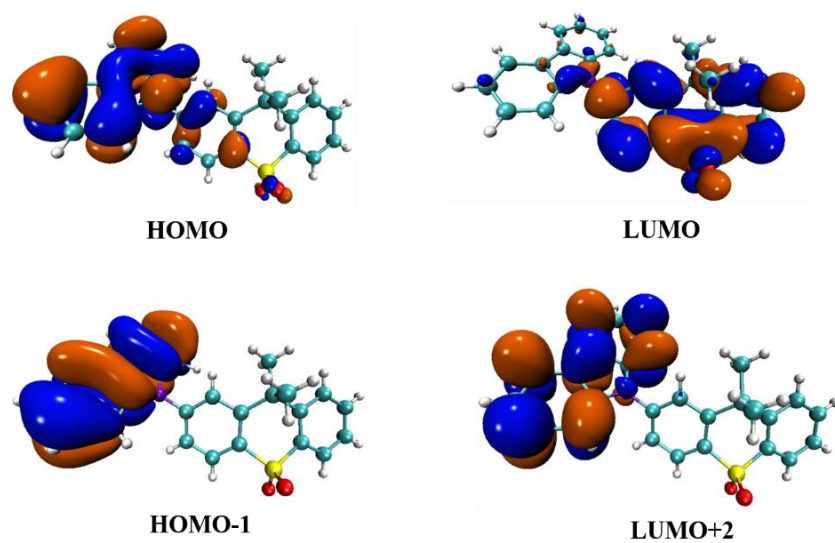

**Figure S18.** Calculated electron cloud distributions of HOMO, HOMO-1, LUMO and LUMO+2 orbitals of monomeric CzSO (isovalue is 0.02).

**Table S3.** The singlet and triplet excited state transition configurations of monomeric **CzSO** revealed by TD-DFT calculations (isovalue is 0.02).

| monomeric <b>CzSO</b>          |                                                                                     |       |                      |       |            |
|--------------------------------|-------------------------------------------------------------------------------------|-------|----------------------|-------|------------|
|                                | Transition configuration                                                            | CI    | Transition Character | $f$   | $\Delta E$ |
| S <sub>0</sub> -S <sub>1</sub> | 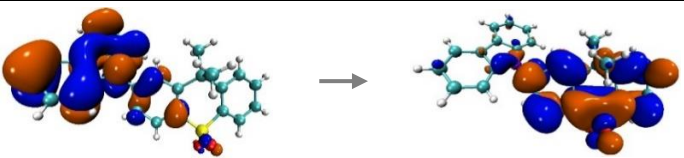   | 93.8% | intramolecular CT    | 0.165 | 3.790 eV   |
| S <sub>0</sub> -S <sub>2</sub> |    | 91.6% | LE(Cz)               | 0.052 | 4.164 eV   |
| S <sub>0</sub> -S <sub>3</sub> |    | 89.2% | intramolecular CT    | 0.002 | 4.199 eV   |
| S <sub>0</sub> -S <sub>4</sub> |   | 92.7% | intramolecular CT    | 0.001 | 4.204 eV   |
| S <sub>0</sub> -S <sub>5</sub> |  | 93.3% | intramolecular CT    | 0.020 | 4.620 eV   |
| S <sub>0</sub> -S <sub>6</sub> |  | 74.6% | LE(Cz)               | 0.121 | 4.656 eV   |
| S <sub>0</sub> -T <sub>1</sub> |  | 70.8% | LE(Cz)               | 0.000 | 3.120 eV   |
| S <sub>0</sub> -T <sub>2</sub> |  | 48.7% | intramolecular CT    | 0.000 | 3.255 eV   |
| S <sub>0</sub> -T <sub>3</sub> |  | 81.3% | LE(Cz)               | 0.000 | 3.422 eV   |

**Table S4.** The singlet and triplet excited state transition configurations of monomeric **CzSO** revealed by TD-DFT calculations. The matched triplet excited states that contain the same orbital transition components of  $S_1$  were highlighted in red.

|       | n-th     | Energy (eV)  | Transition configuration (%)                                                                                          |
|-------|----------|--------------|-----------------------------------------------------------------------------------------------------------------------|
| $S_n$ | <b>1</b> | <b>3.790</b> | <b>H→L (93.8)</b>                                                                                                     |
| $T_n$ | 1        | 3.120        | H-2→L+2 (5.0), H-1→L+2 (70.8), H-1→L+3 (1.0), H→L+5 (13.1), H-1→L+6 (1.2)                                             |
|       | 2        | 3.255        | H-6→L+4 (1.5), H-5→L+3 (2.3), H-4→L (5.1), H→L (48.7), H→L+2 (6.2)                                                    |
|       | 3        | 3.422        | H-6→L+1 (1.6), H-5→L (1.2), H-2→L+5 (3.9), H→L+2 (81.3), H→L+3 (1.1)                                                  |
|       | 4        | 3.586        | H-9→L (1.3), H-9→L+3 (1.7), H-6→L+4 (3.6), H-3→L (16.1), H-3→L+3 (21.1)                                               |
|       | <b>5</b> | <b>3.902</b> | H-7→L+2 (1.2), H-6→L (1.3), H-6→L+1 (22.2), H-5→L (5.6), H-4→L+1 (5.6), H-3→L (1.5), H-2→L+5 (2.1), <b>H→L (28.4)</b> |
|       | 6        | 3.994        | H-4→L+1 (1.6), H-1→L+2 (0.9), H→L+1 (77.8)                                                                            |
|       | 7        | 4.070        | H-2→L (1.2), H-2→L+2 (5.2), H-1→L+3 (1.9), H-1→L+6 (1.7), H→L+1 (2.4), H→L+5 (35.7)                                   |
|       | 8        | 4.148        | H-2→L+2 (8.3), H→L (59.7), H→L+5 (17.3)                                                                               |

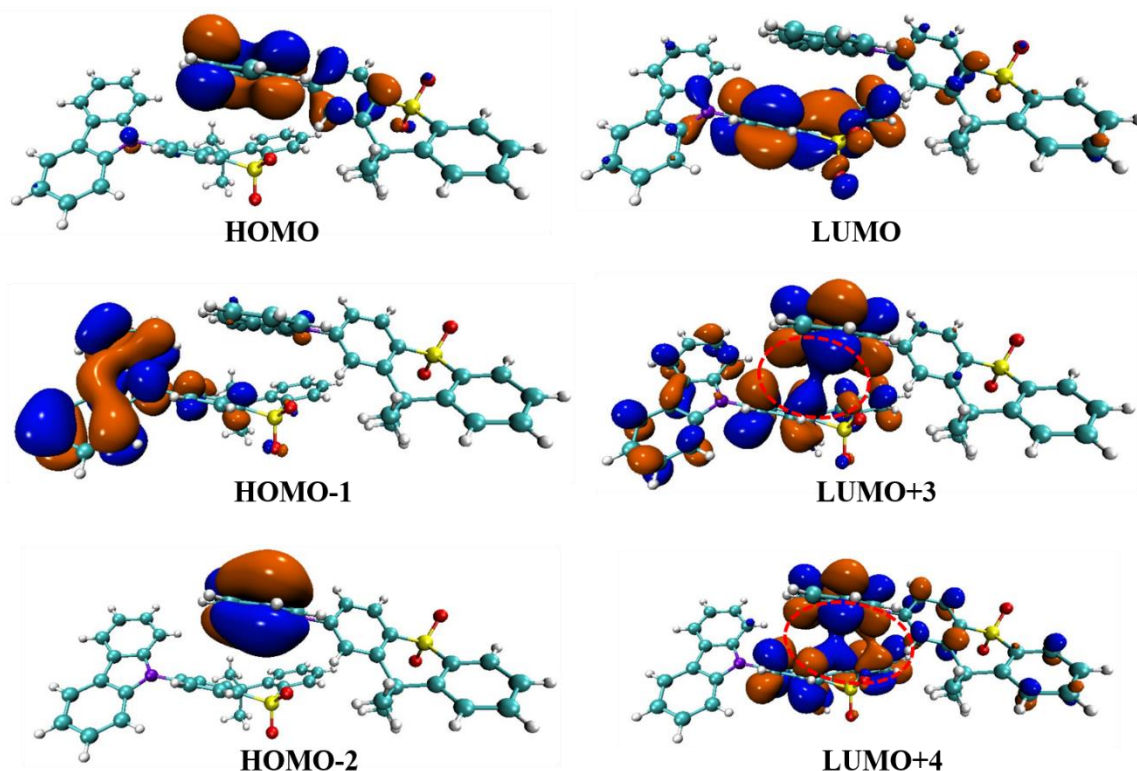

**Figure S19.** Calculated electron cloud distribution of HOMO, HOMO-1, HOMO-2, LUMO, LUMO+3 and LUMO+4 orbitals of dimeric **CzSO** aggregates (isovalue is 0.02).

**Table S5.** The singlet excited state transition configurations of dimeric **CzSO** aggregates revealed by TD-DFT calculations (isovalue is 0.02).

| dimeric <b>CzSO</b>            |                                                                                     |       |                                                   |       |            |
|--------------------------------|-------------------------------------------------------------------------------------|-------|---------------------------------------------------|-------|------------|
|                                | Transition configuration                                                            | CI    | Transition Character                              | $f$   | $\Delta E$ |
| S <sub>0</sub> -S <sub>1</sub> |    | 97.2% | <b>intermolecular CT</b>                          | 0.003 | 3.765 eV   |
| S <sub>0</sub> -S <sub>2</sub> |    | 81.7% | intramolecular CT                                 | 0.259 | 3.819 eV   |
| S <sub>0</sub> -S <sub>3</sub> |    | 78.2% | intramolecular CT                                 | 0.066 | 3.837 eV   |
| S <sub>0</sub> -S <sub>4</sub> |   | 49.6% | <b>intermolecular CT</b><br>+ LE(C <sub>z</sub> ) | 0.052 | 4.100 eV   |
| S <sub>0</sub> -S <sub>5</sub> |  | 89.7% | <b>intermolecular CT</b>                          | 0.010 | 4.108 eV   |
| S <sub>0</sub> -S <sub>6</sub> |  | 78.3% | <b>intermolecular CT</b><br>+ LE(C <sub>z</sub> ) | 0.051 | 4.149 eV   |

**Table S6.** The singlet and triplet excited state transition configurations of dimeric **CzSO** aggregates revealed by TD-DFT calculations. The matched triplet excited states that contain the same orbital transition components of  $S_1$  were highlighted in red.

|       | n-th | Energy (eV) | Transition configuration (%)                                                                                                                                                                               |
|-------|------|-------------|------------------------------------------------------------------------------------------------------------------------------------------------------------------------------------------------------------|
| $S_n$ | 1    | 3.765       | H→L (97.2)                                                                                                                                                                                                 |
| $T_n$ | 1    | 3.119       | H-2→L+2 (7.6), H-2→L+3 (32.2), H-2→L+4 (21.1), H-2→L+8 (1.0), H→L+11 (12.2)                                                                                                                                |
|       | 2    | 3.120       | H-2→L+2 (7.6), H-15→L+14 (4.0), H-5→L+2 (3.9), H-5→L+12 (2.8), H-3→L+2 (62.8), H-3→L+6 (1.0)                                                                                                               |
|       | 3    | 3.263       | H-11→L+5 (3.6), H-10→L+1 (5.0), H-10→L+7 (2.1), H-7→L+1 (3.7), H-6→L+1 (1.1), H→L+1 (37.5), H→L+3 (4.8), H→L+4 (4.0), H→L+7 (6.6)                                                                          |
|       | 4    | 3.270       | H-13→L (1.8), H-12→L (1.7), H-11→L (1.7), H-1→L (39.1), H-1→L+1 (1.8), H-1→L+2 (4.2), H→L (1.3), H→L+1 (1.3)                                                                                               |
|       | 5    | 3.388       | H-4→L+15 (1.2), H→L (0.3), H→L+2 (8.8), H→L+3 (35.6), H→L+4 (22.3)                                                                                                                                         |
|       | 6    | 3.414       | H-9→L (1.8), H-5→L+14 (1.2), H-1→L+2 (69.1), H-1→L+6 (1.1), H→L+2 (1.9)                                                                                                                                    |
|       | 7    | 3.568       | H-13→L (1.2), H-12→L (5.0), H-12→L+3 (1.4), H-12→L+9 (3.2), H-12→L+8 (6.5), H-11→L (2.3), H-9→L (7.1), H-9→L+3 (2.6), H-9→L+6 (6.9), H-9→L+8 (4.4), H-8→L+8 (8.1), H-8→L+8 (8.1), H-7→L+8 (3.6), H→L (3.6) |
|       | 8    | 3.588       | H-12→L+9 (1.2), H-10→L+7 (2.5), H-10→L+9 (5.8), H-8→L+7 (4.8), H-8→L+9 (2.4), H-7→L+1 (2.9), H-7→L+5 (3.3), H-6→L+1 (9.8), H-6→L+9 (8.5)                                                                   |
|       | 9    | 3.773       | H→L (84.3), H→L+1 (3.5)                                                                                                                                                                                    |
|       | 10   | 3.910       | H-15→L+2 (1.2), H-14→L+4 (0.8), H-13→L+4 (8.0), H-13→L+5 (3.2), H-13→L+8 (3.0), H-12→L+3 (1.3), H-9→L (5.3), H-3→L+14 (1.5), H-1→L (27.1), H→L (1.5)                                                       |
|       | 11   | 3.924       | H-12→L+5 (4.4), H-12→L+9 (1.6), H-7→L+5 (2.2), H→L (0.03), H→L+1 (29.3), H→L+13 (4.2)                                                                                                                      |
|       | 12   | 4.028       | H-10→L+5 (1.7), H-4→L+3 (1.7), H-4→L+4 (1.3), H-2→L+1 (1.7), H-2→L+3 (4.5), H-2→L+4 (2.9), H→L+3 (3.0), H→L+9 (6.4)                                                                                        |
|       | 13   | 4.040       | H-3→L+2 (4.9), H-1→L+2 (3.3), H-1→L+3 (23.8), H-1→L+10 (10.4), H→L+3 (1.3)                                                                                                                                 |
|       | 14   | 4.057       | H-10→L+11 (1.0), H-2→L (19.0), H→L+5 (23.1), H→L+9 (3.4), H→L+11 (19.2)                                                                                                                                    |
|       | 15   | 4.078       | H-5→L+3 (1.5), H-3→L (8.5), H-3→L+2 (13.8), H-1→L+4 (6.6), H-1→L+10 (34.8), H→L+10 (1.1)                                                                                                                   |

The calculated results indicated that the electronic transitions from the ground state ( $S_0$ ) to the first excited singlet state ( $S_1$ ) for monomeric and dimeric **CzSO** are mainly derived from the highest occupied molecular orbital (HOMO) to the lowest unoccupied molecular orbital (LUMO). Energy levels of the possible  $T_n$  states with  $\pm 0.3$  eV range relative to the  $S_1$  were illustrated in Figure 2c, and  $T_n$  states with the same transition orbital compositions as  $S_1$  state were also indicated because they are the main elements for the intersystem crossing process from  $S_1$  to  $T_n$  states.<sup>[12]</sup>

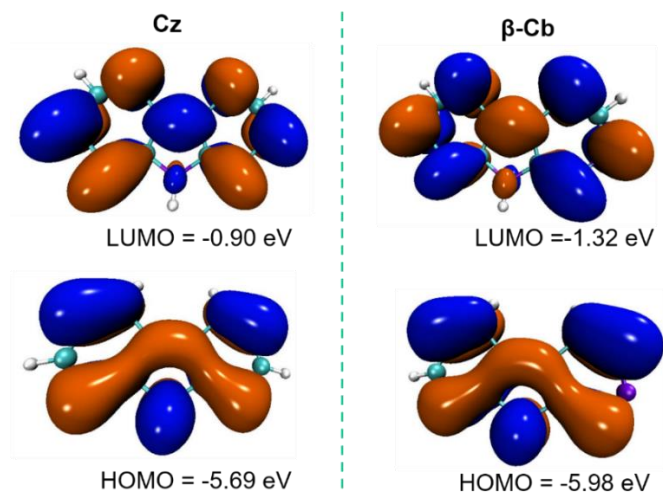

**Figure S20.** The calculated electron cloud distribution and energy levels of HOMO and LUMO orbitals of **Cz** and  **$\beta$ -Cb** (B3LYP functional and 6-311g (d, p) basis, isovalue is 0.02).

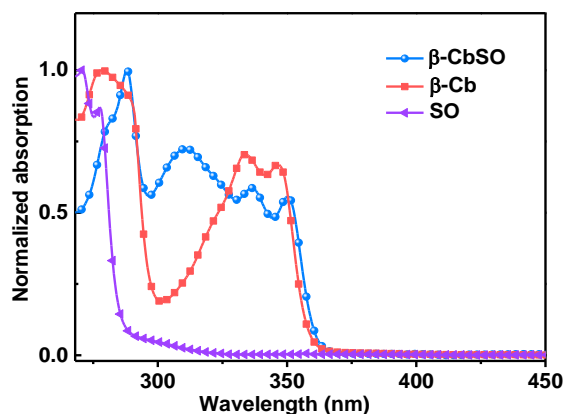

**Figure S21.** Normalized absorption spectra of  **$\beta$ -CbSO**,  **$\beta$ -Cb** and **SO** in dilute MeCN solution.

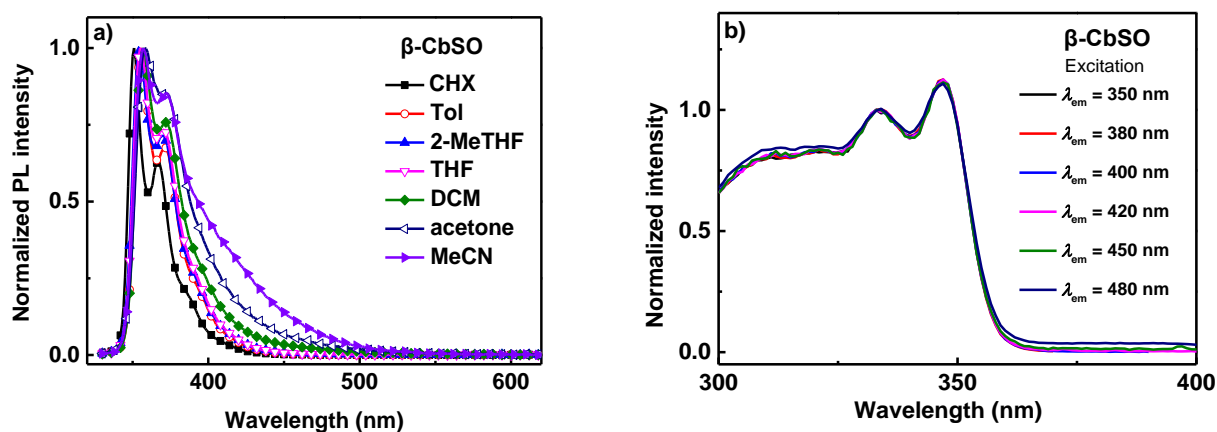

**Figure S22.** a) PL emission spectra of  **$\beta$ -CbSO** in solutions with different polarity environments under ambient conditions ( $\lambda_{ex} = 320$  nm,  $10^{-5}$  M). b) Excitation spectra of  **$\beta$ -CbSO** in dilute MeCN solution.

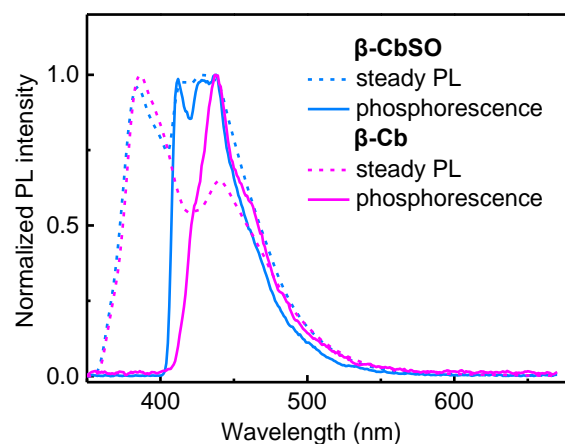

**Figure S23.** Steady-state PL and phosphorescence spectra (delay 40 Hz) of  **$\beta$ -CbSO** (blue line) and  **$\beta$ -Cb** (pink line) in dilute 2-MeTHF solution ( $10^{-5}$  M,  $\lambda_{\text{ex}} = 330$  nm) at 77 K.

Accordingly, the triplet energy level of  **$\beta$ -CbSO** ( $E_{\text{T1}}$ ) is determined to be 3.02 eV in 2-MeTHF solution.

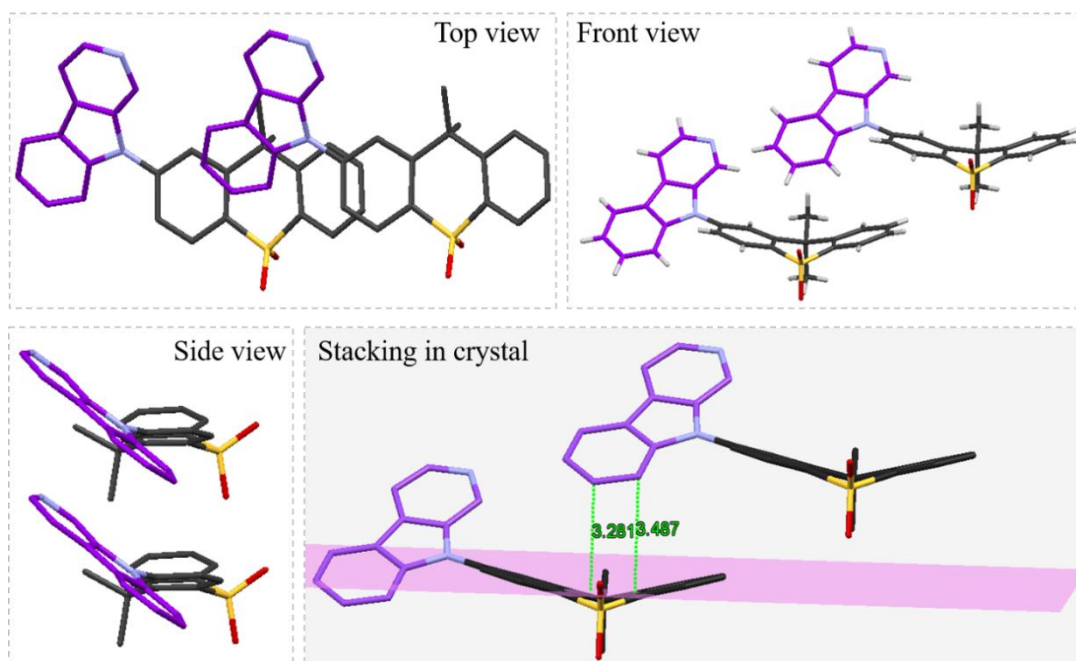

**Figure S24.** Molecular stacking in single crystal sample of  **$\beta$ -CbSO**. The shortest distance between the  $\pi$  systems of  **$\beta$ -Cb** and **SO** is 3.281 Å.

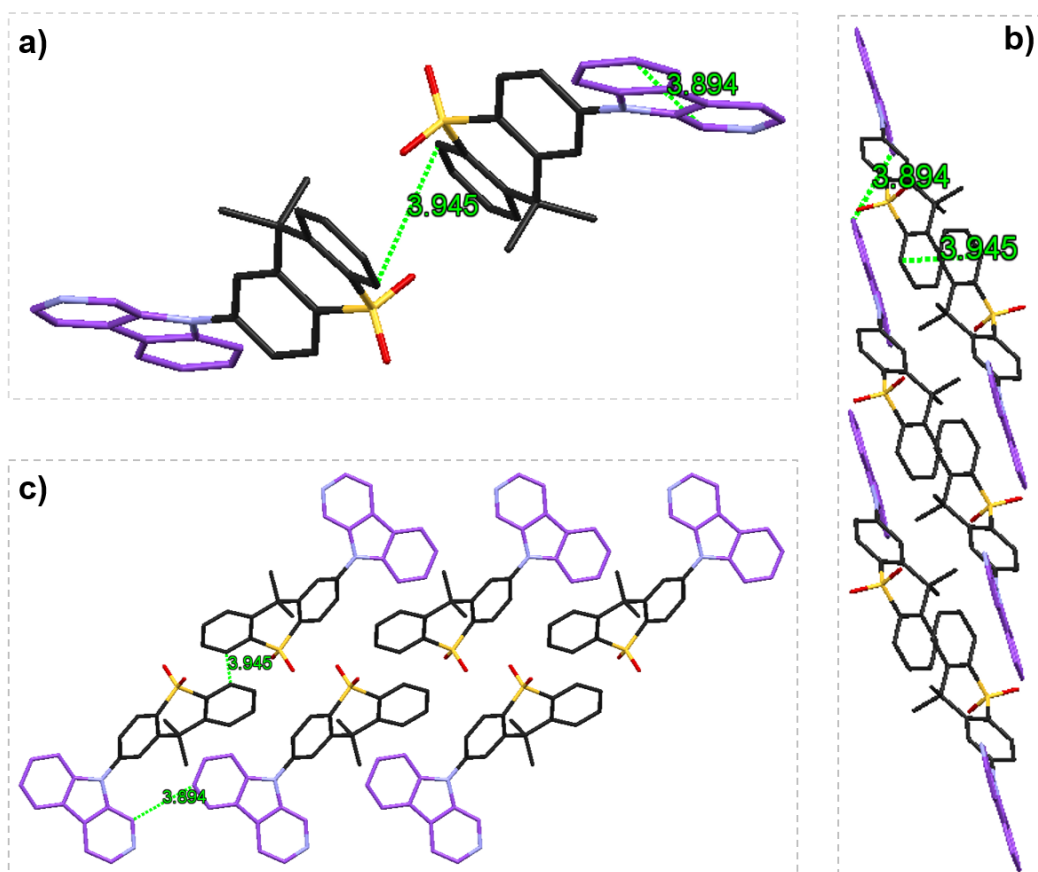

**Figure S25.** Molecular packing in the crystal lattice of  $\beta$ -CbSO. View down: a) the a-axis; b) the b-axis; and c) the c-axis, respectively.

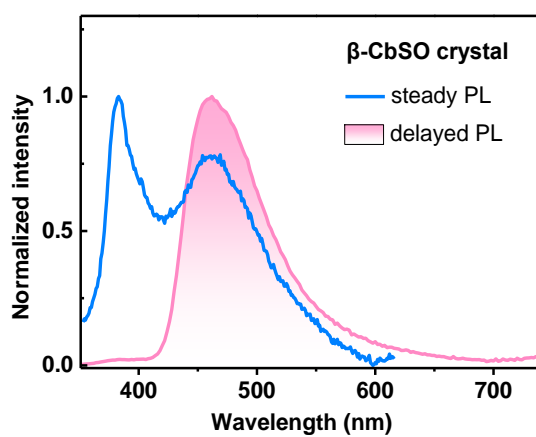

**Figure S26.** Steady state and delayed PL spectra (delay 0.1 ms) of crystalline  $\beta$ -CbSO ( $\lambda_{\text{ex}} = 330$  nm).



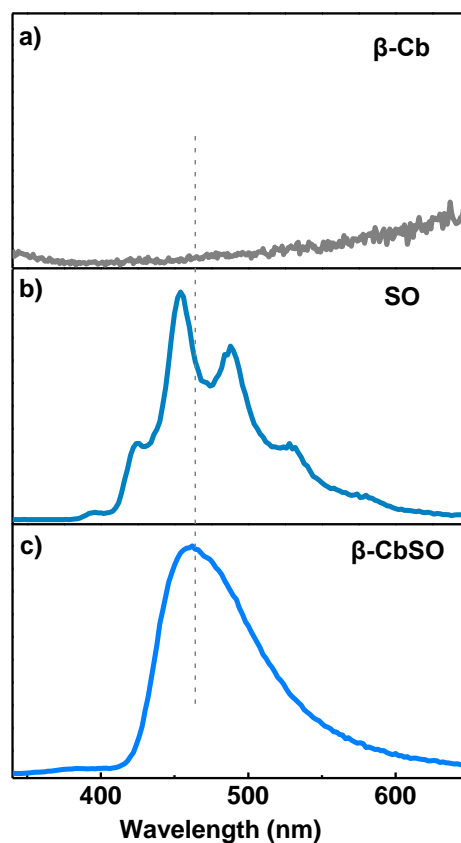

**Figure S27.** Delayed PL spectra (delay time = 0.1 ms) of: a) crystalline  $\beta$ -Cb; b) crystalline SO, and c) crystalline  $\beta$ -CbSO ( $\lambda_{\text{ex}} = 330$  nm).

Because the delayed emission spectrum of the lower-energy UOL band of crystalline  $\beta$ -CbSO differs distinctly from that of either crystalline  $\beta$ -Cb or crystalline SO (Figure S27), the ultralong-lived emission band of crystalline  $\beta$ -CbSO should not originate from the RTP from either  $\beta$ -Cb or SO, but from the I-TSCT excited state of  $\beta$ -Cb  $\cdot\cdot$  SO [I-TSCT $_{(\beta\text{-Cb}\cdot\cdot\text{SO})}^*$ ]. Consistent with CzSO, as I-TSCT complexes own very small energy differences between their singlet [ $S_1^*$ (I-TSCT)] and triplet [ $T_1^*$ (I-TSCT)] excited states due to their spatially separated electron and hole wavefunctions, it is difficult to differentiate their phosphorescence [radiative deactivation of their  $T_1^*$ (I-TSCT) excitons] from their ultralong TADF [radiative deactivation of their  $S_1^*$ (I-TSCT) excitons populated *via* RISC]. Therefore, the persistent luminescence of  $\beta$ -CbSO crystals can also be attributed to the ultra-long TADF and RTP dual-channel emission from its I-TSCT excitons.

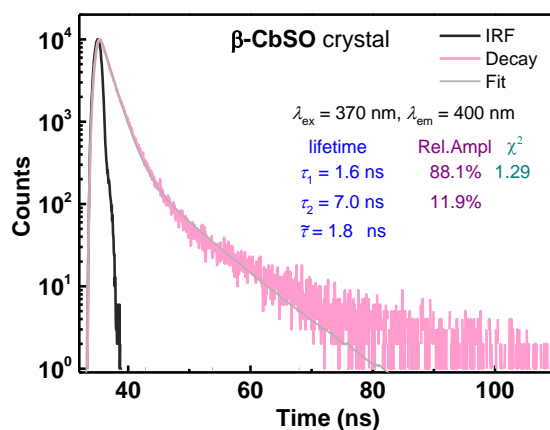

**Figure S28.** PL decay profile of the higher-energy PL emission band of crystalline  $\beta$ -CbSO recorded at  $\lambda_{em} = 400$  nm under ambient conditions ( $\lambda_{ex} = 370$  nm) with a time-range window of 200 ns.

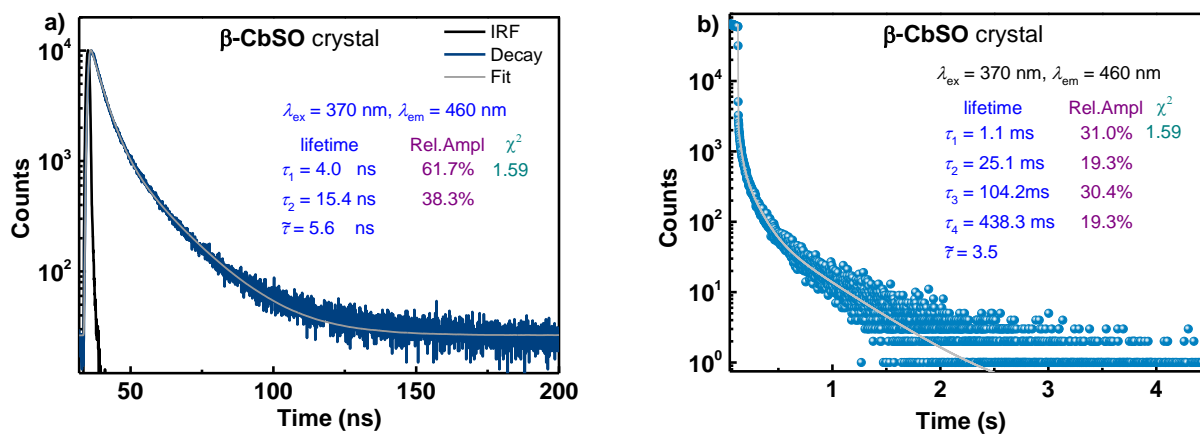

**Figure S29.** PL decay profiles of the lower-energy PL emission band of crystalline  $\beta$ -CbSO recorded at  $\lambda_{em} = 460$  nm under ambient conditions (UV-light excitation,  $\lambda_{ex} = 370$  nm) at different time-range windows of: a) 200 ns; and b) 5.6 s.

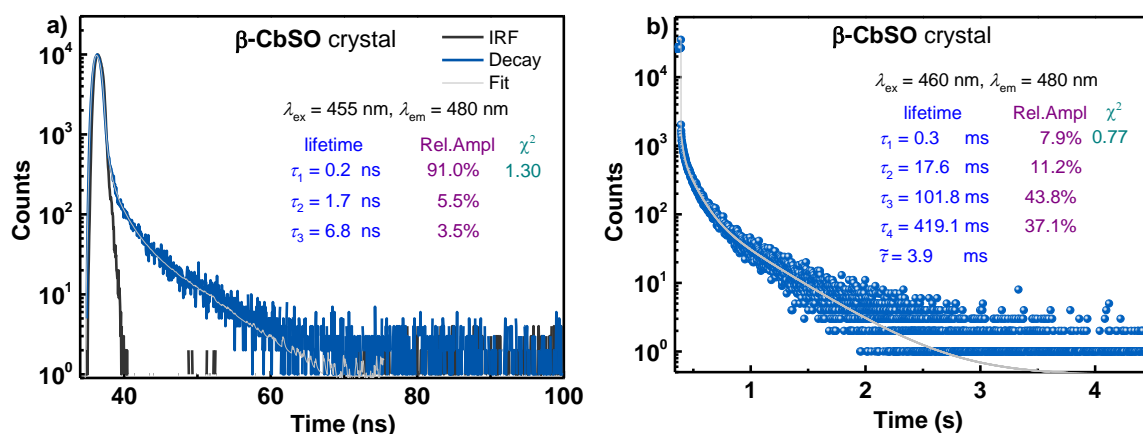

**Figure S30.** PL decay profiles of the lower-energy emission band of crystalline  **$\beta$ -CbSO** recorded at  $\lambda_{em} = 480$  nm under ambient conditions (visible light excitation,  $\lambda_{ex} = 455$  or 460 nm) at different time-range windows of: a) 200 ns; and b) 5.6 s.

After careful comparison between the PL decay and IRF curves, we conjectured that the species with the shortest lifetime ( $\tau < 1$  ns) in Figure S30a may originate from the excitation source (nano-diode 455 nm) through light scattering.

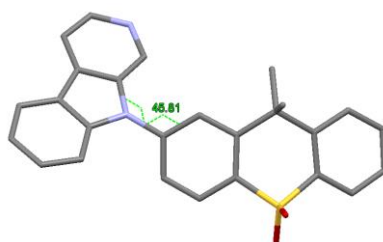

**Figure S31.** The molecular structure in  **$\beta$ -CbSO** single-crystals. The torsion angles between  **$\beta$ -Cb** and **SO** unit is indicated by green dashed lines: 45.81°.

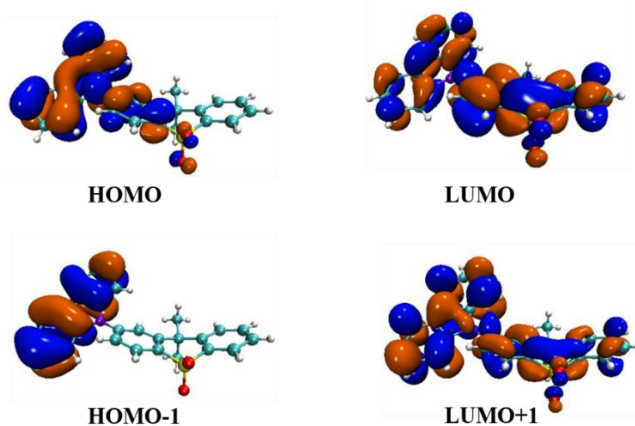

**Figure S32.** Calculated electron cloud distributions of HOMO, HOMO-1, LUMO and LUMO+1 orbitals of monomeric  **$\beta$ -CbSO** (isovalue is 0.02).

**Table S7.** The singlet and triplet excited state transition configurations of monomeric  $\beta$ -CbSO revealed by TD-DFT calculations (isovalue is 0.02).

| monomeric $\beta$ -CbSO        |                                                                                     |       |                                         |        |            |
|--------------------------------|-------------------------------------------------------------------------------------|-------|-----------------------------------------|--------|------------|
|                                | Transition configuration                                                            | CI    | Transition Character                    | $f$    | $\Delta E$ |
| S <sub>0</sub> -S <sub>1</sub> |    | 60.9% | intramolecular CT<br>+ LE( $\beta$ -cb) | 0.210  | 3.996 eV   |
| S <sub>0</sub> -S <sub>2</sub> |    | 60.4% | intramolecular CT<br>+ LE( $\beta$ -cb) | 0.1733 | 4.081 eV   |
| S <sub>0</sub> -S <sub>3</sub> |    | 90.2% | intramolecular CT                       | 0.0037 | 4.404 eV   |
| S <sub>0</sub> -S <sub>4</sub> |   | 65.6% | intramolecular CT                       | 0.0019 | 4.645 eV   |
| S <sub>0</sub> -S <sub>5</sub> |  | 74.1% | intramolecular CT<br>+ LE( $\beta$ -cb) | 0.0569 | 4.736 eV   |
| S <sub>0</sub> -S <sub>6</sub> |  | 66.9% | intramolecular CT<br>+ LE( $\beta$ -cb) | 0.0407 | 4.760 eV   |
| S <sub>0</sub> -T <sub>1</sub> |  | 36.7% | intramolecular CT<br>+ LE( $\beta$ -cb) | 0.000  | 3.168 eV   |
| S <sub>0</sub> -T <sub>2</sub> |  | 49.5% | intramolecular CT<br>+ LE( $\beta$ -cb) | 0.000  | 3.254 eV   |
| S <sub>0</sub> -T <sub>3</sub> |  | 61.9% | intramolecular CT<br>+ LE( $\beta$ -cb) | 0.000  | 3.282 eV   |

**Table S8.** The singlet and triplet excited state transition configurations of monomeric  $\beta$ -CbSO revealed by TD-DFT calculations. The matched triplet excited states that contain the same orbital transition components of  $S_1$  were highlighted in red.

|       | n-th | Energy (eV) | Transition configuration (%)                                                                                                         |
|-------|------|-------------|--------------------------------------------------------------------------------------------------------------------------------------|
| $S_n$ | 1    | 3.996       | H→L (60.9)                                                                                                                           |
| $T_n$ | 1    | 3.168       | H-5→L+1 (3.9), H-1→L+1 (36.7), H→L (3.0), H→L+5 (10.0)                                                                               |
|       | 2    | 3.254       | H-6→L (8.6), H-6→L+1 (2.5), H→L (49.6), H→L+1 (3.0)                                                                                  |
|       | 3    | 3.282       | H-5→L +5(2.8), H-1→L +1(8.3), H→L +1(61.9), H→L +5(3.2)                                                                              |
|       | 4    | 3.570       | H-4→L (7.5), H-4→L+1 (2.8), H-4→L+2 (5.4), H-4→L+3 (6.5), H-3→L (6.3), H-3→L+1 (3.0), H-3→L+3 (22.8), H-3→L+4 (7.0)                  |
|       | 5    | 3.970       | H-2→L+1 (44.3), H-2→L+6 (4.2), H-2→L+7 (5.3), H→L+6 (3.6)                                                                            |
|       | 6    | 3.974       | H-9→L+1 (1.8), H-7→L+2 (14.9), H-7→L+4 (2.2), H-5→L+5 (5.5), H-2→L+1 (13.3), H-2→L+6 (1.7), H-2→L+7 (1.7), H-1→L+7 (2.0), H→L (14.0) |
|       | 7    | 4.049       | H-6→L+2 (5.3), H-5→L+1 (1.7), H→L+2 (70.0), H→L+4 (5.4), H→L+5 (2.3), H→L+6 (1.7)                                                    |
|       | 8    | 4.123       | H-5→L+1 (17.6), H-1→L (5.8), H→L+5 (41.2), H→L+7 (1.8)                                                                               |

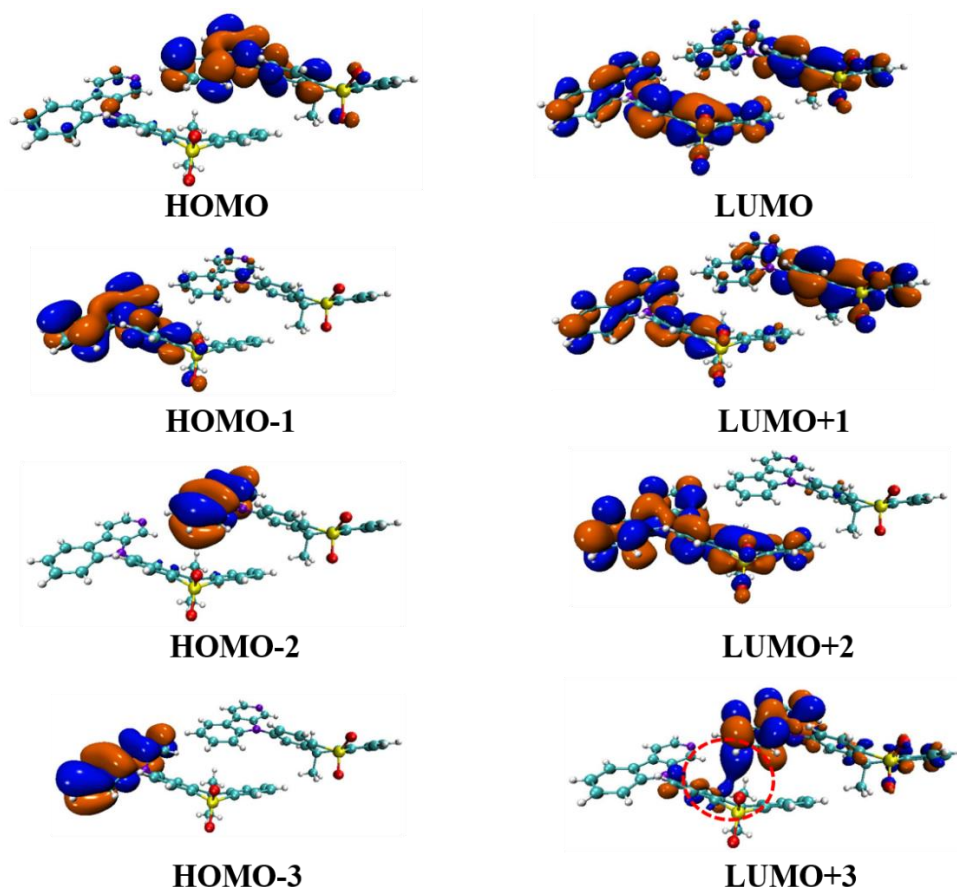

**Figure S33.** Calculated electron cloud distribution of HOMO, HOMO-1, HOMO-2, HOMO-3, LUMO, LUMO+1, LUMO+2 and LUMO+3 orbitals of dimeric  $\beta$ -CbSO aggregates (isovalue is 0.02).

**Table S9.** The singlet and triplet excited state transition configurations of dimeric  $\beta$ -CbSO aggregates revealed by TD-DFT calculations (isovalue is 0.02).

| dimeric $\beta$ -CbSO          |                          |       |                                                    |       |            |
|--------------------------------|--------------------------|-------|----------------------------------------------------|-------|------------|
|                                | Transition configuration | CI    | Transition Character                               | $f$   | $\Delta E$ |
| S <sub>0</sub> -S <sub>1</sub> |                          | 48.8% | intramolecular CT<br>+<br><b>intermolecular CT</b> | 0.375 | 3.952 eV   |
| S <sub>0</sub> -S <sub>2</sub> |                          | 40.0% | intramolecular CT<br>+<br><b>intermolecular CT</b> | 0.151 | 3.985 eV   |
|                                |                          | 24.1% |                                                    |       |            |
| S <sub>0</sub> -S <sub>3</sub> |                          | 75.9% | <b>intermolecular CT</b><br>+ LE( $\beta$ -cb)     | 0.022 | 4.042 eV   |
| S <sub>0</sub> -S <sub>4</sub> |                          | 51.2% | <b>intramolecular CT</b><br>+ LE( $\beta$ -cb)     | 0.125 | 4.071 eV   |
| S <sub>0</sub> -S <sub>5</sub> |                          | 29.6% | intramolecular CT<br>+<br><b>intermolecular CT</b> | 0.047 | 4.146 eV   |
|                                |                          | 28.9% |                                                    |       |            |
| S <sub>0</sub> -S <sub>6</sub> |                          | 66.0% | intramolecular CT<br>+<br><b>intermolecular CT</b> | 0.002 | 4.320 eV   |

**Table S10.** The singlet and triplet excited state transition configurations of dimeric  $\beta$ -CbSO aggregates revealed by TD-DFT calculations. The matched triplet excited states that contain the same orbital transition components of  $S_1$  were highlighted in red.

|       | n-th      | Energy (eV)  | Transition configuration (%)                                                                                                |
|-------|-----------|--------------|-----------------------------------------------------------------------------------------------------------------------------|
| $S_n$ | <b>1</b>  | <b>3.952</b> | <b>H→L (48.8)</b>                                                                                                           |
| $T_n$ | 1         | 3.165        | H-11→L+2 (3.2), H-3→L (13.4), H-3→L+1 (4.1), H-3→L+2 (28.0), H-3→L+3 (0.1)                                                  |
|       | 2         | 3.165        | H-18→L+15 (2.0), H-8→L+3 (1.6), H-2→L+1 (3.9), H-2→L+3 (49.1)                                                               |
|       | 3         | 3.231        | H-14→L+4 (2.3), H-1→L+1 (2.3), H→L+1 (28.5), H→L+6 (6.7)                                                                    |
|       | 4         | 3.249        | H-13→L (2.6), H-12→L (2.9), H-12→L+1 (1.7), H-1→L (28.9), H-1→L+1 (12.1)                                                    |
|       | 5         | 3.279        | H-11→L+2 (1.7), H-3→L (3.6), H-3→L+1 (3.7), H-3→L+2 (6.9), H-1→L (6.4), H-1→L+1 (9.8), H-1→L+2 (48.7)                       |
|       | 6         | 3.296        | H-2→L+3 (8.0), H-1→L+3 (3.6), H→L+3 (66.9)                                                                                  |
|       | 7         | 3.569        | H-13→L+8 (2.9), H-10→L (1.7), H-10→L+4 (4.2), H-10→L+6 (1.9), H-10→L+7 (1.7), H-10→L+8 (20.5), H-9→L+1 (5.5), H-8→L+1 (2.0) |
|       | 8         | 3.570        | H-9→L+9 (3.2), H-7→L+2 (5.5), H-7→L+9 (6.1)                                                                                 |
|       | <b>9</b>  | <b>3.943</b> | H-18→L+3 (2.0), H-14→L+4 (4.5), H-13→L+1 (2.0), H-9→L+11 (1.5), H-2→L+15 (1.6), <b>H→L (6.8)</b> , H→L+4 (10.2)             |
|       | <b>10</b> | <b>3.963</b> | H-12→L (1.5), H-12→L+5 (3.2), H-3→L+14 (2.2), H-1→L+2 (2.1), H-1→L+5 (1.4), H-1→L+7 (1.8), <b>H→L (1.6)</b>                 |
|       | 11        | 3.978        | H-4→L+1 (4.3), H-4→L+3 (69.9), H-4→L+13 (5.5), H-4→L+15 (6.4)                                                               |
|       | 12        | 3.990        | H-5→L (7.4), H-5→L+1 (7.8), H-5→L+2 (18.0), H-5→L+12 (2.4), H-5→L+14 (2.4), H→L+4 (30.0), H→L+13 (1.9)                      |
|       | <b>13</b> | <b>3.992</b> | H-5→L (9.9), H-5→L+1 (10.9), H-5→L+2 (24.8), H-5→L+12 (3.3), H-5→L+14 (3.3), H→L (1.7), <b>H→L+5 (1.7)</b> , H→L+8 (1.8)    |
|       | <b>14</b> | <b>4.034</b> | H-13→L+5 (1.8), H-12→L+5 (2.8), H-1→L+3 (9.1), H-1→L+4 (6.8), H-1→L+5 (49.8), H-1→L+12 (1.6), <b>H→L (0.03)</b>             |
|       | <b>15</b> | <b>4.118</b> | H-11→L+12 (2.3), H-3→L (4.2), H-3→L+1 (4.8), H-3→L+2 (13.7), H-1→L+10 (38.2), <b>H→L (0.8)</b>                              |
|       | <b>16</b> | <b>4.123</b> | H-9→L+3 (3.9), H-6→L+3 (2.8), H-2→L+3 (16.5), H-1→L+11 (1.6), <b>H→L (7.7)</b> , H→L+1 (4.7), H→L+4 (2.5), H→L+11 (32.2)    |
|       | <b>17</b> | <b>4.148</b> | H-8→L+3 (1.9), H-1→L (3.1), <b>H→L (34.0)</b> , H→L+1 (18.9), H→L+4 (1.4), H→L+7 (1.6)                                      |
|       | 18        | 4.289        | H-14→L+4 (3.1), H-8→L+11 (2.6), H-1→L+12 (1.7), H→L (1.7), H→L+3 (4.7), H→L+6 (1.4), H→L+13 (14.7)                          |

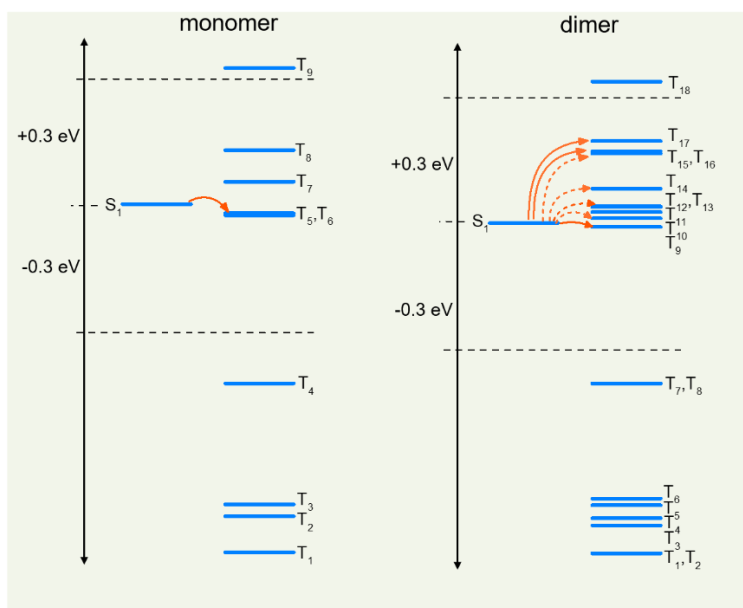

**Figure S34.** The calculated energy levels of monomeric and dimeric  $\beta$ -CbSO aggregates based on PBE0/6-311g (d) calculations.

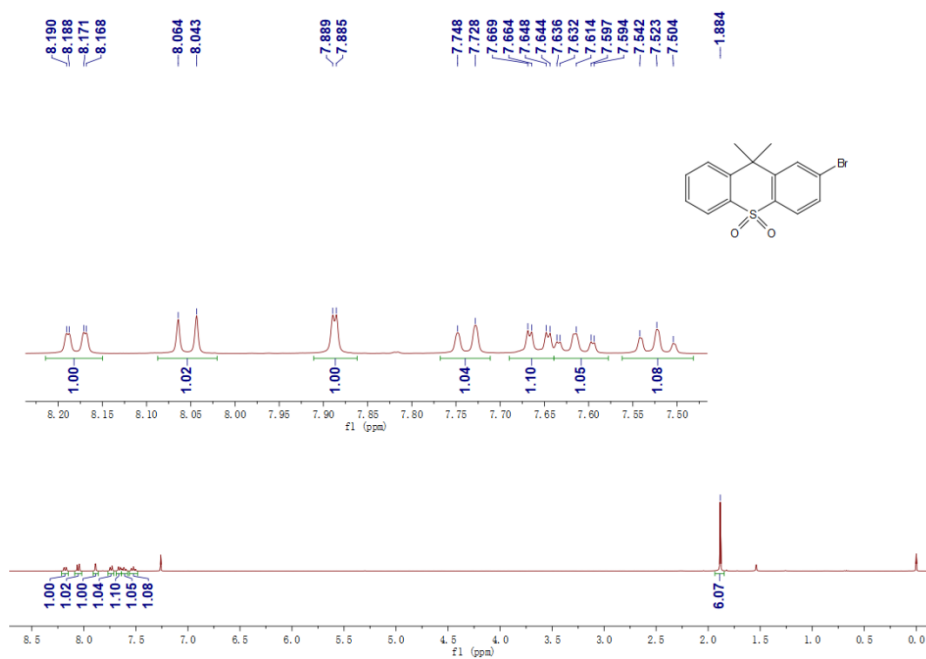

**Figure S35.** The  $^1\text{H}$  NMR spectrum of the intermediate **3** in  $\text{CDCl}_3$ .



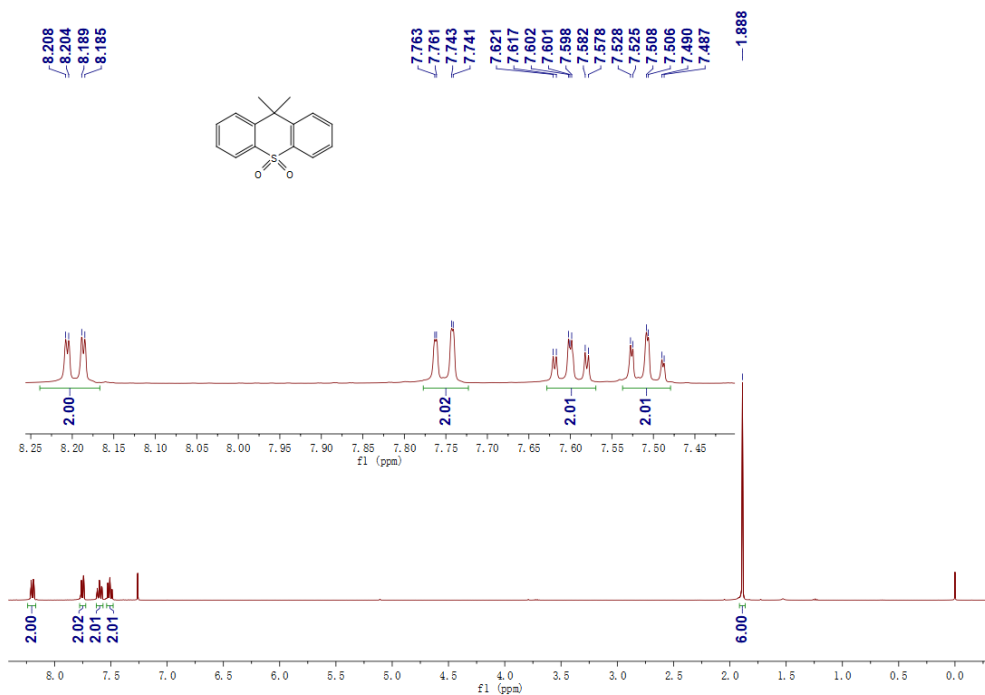

Figure S36. The  $^1\text{H}$  NMR spectrum of SO in  $\text{CDCl}_3$ .

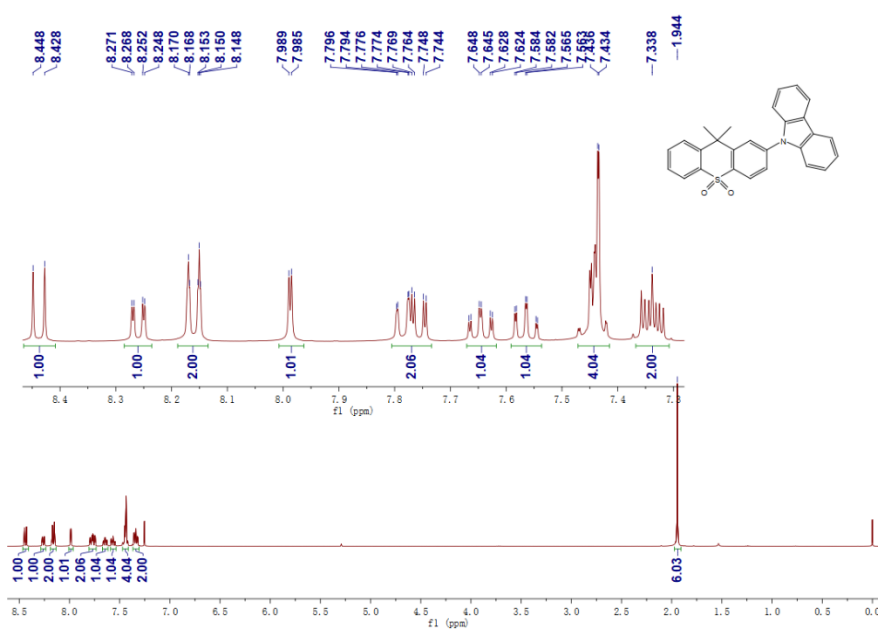

Figure S37. The  $^1\text{H}$  NMR spectrum of CzSO in  $\text{CDCl}_3$ .

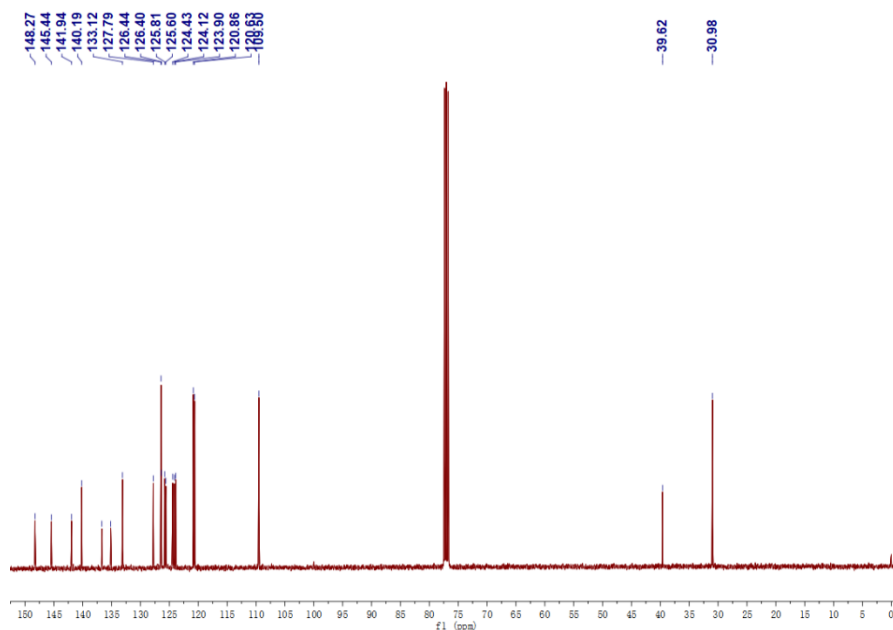

**Figure S38.** The  $^{13}\text{C}$  NMR spectrum of **CzSO** in  $\text{CDCl}_3$ .

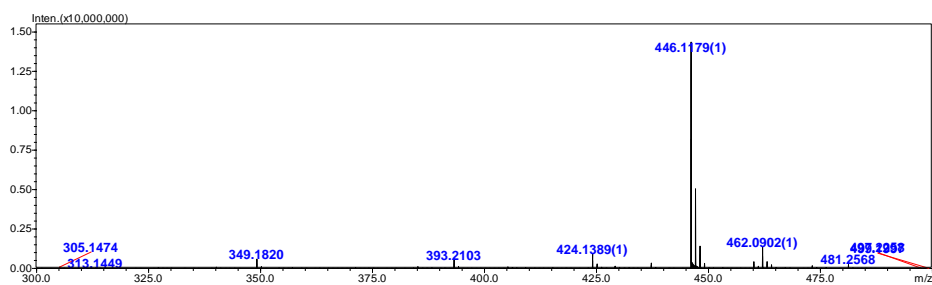

**Figure S39.** High resolution ESI mass spectrum of **CzSO**. Calcd for  $\text{C}_{27}\text{H}_{21}\text{NO}_2\text{SNa}^+$   $[\text{M}+\text{Na}]^+$  446.1185, found 446.1179.

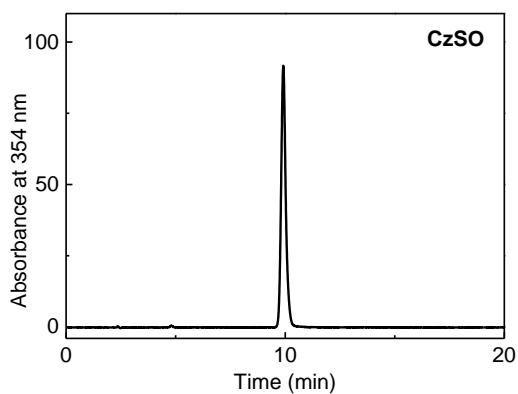

**Figure S40.** HPLC characterization result of **CzSO** (eluent: acetonitrile/water (70/30), monitored at 354 nm).

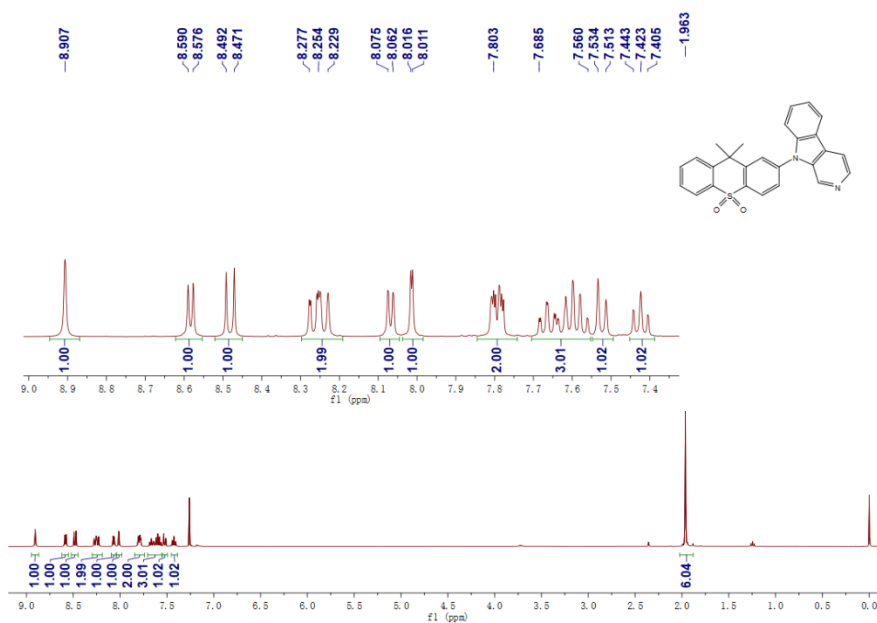

**Figure S41.** The  $^1\text{H}$  NMR spectrum of  $\beta$ -CbSO in  $\text{CDCl}_3$ .

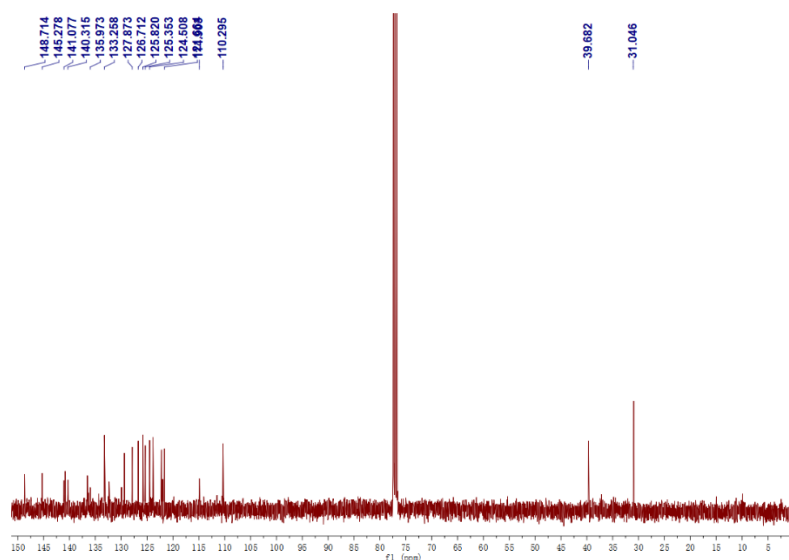

**Figure S42.** The  $^{13}\text{C}$  NMR spectrum of  $\beta$ -CbSO in  $\text{CDCl}_3$ .

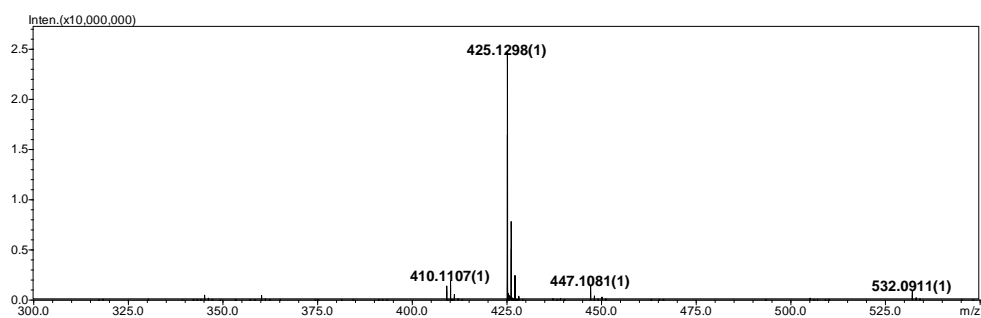

**Figure S43.** High resolution ESI mass spectrum of  $\beta$ -CbSO. Calcd for  $\text{C}_{26}\text{H}_{20}\text{N}_2\text{O}_2\text{SH}^+$   $[\text{M}+\text{H}]^+$  425.1318, found 425.1298.

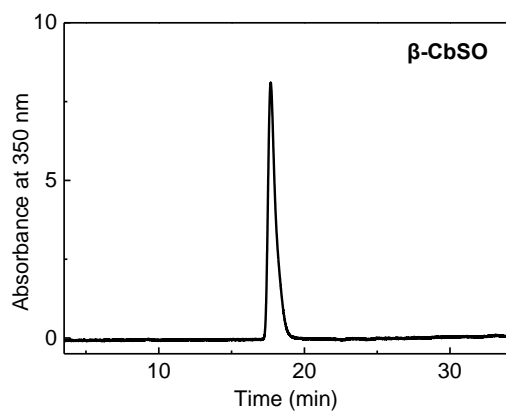

**Figure S44.** HPLC characterization result of  $\beta$ -CbSO (eluent: methanol/water (67/33), monitored at 350 nm).

### 3) A survey of reported ultralong organic luminescence (UOL) materials

**Table S11.** Molecular structures, excitation wavelength, lifetime, efficiency, emission wavelength and emission assignment of the pure organic long persistent luminescence materials with a lifetime over 100 ms under ambient conditions.

| Compound        | Molecular structure                                                                 | $\lambda_{\text{ex}}$ | $\tau_{\text{uol}}$ | $\phi_{\text{uol}}$ | $\lambda_{\text{uol,max}}$ | Emission assignment                                         | Ref.       |
|-----------------|-------------------------------------------------------------------------------------|-----------------------|---------------------|---------------------|----------------------------|-------------------------------------------------------------|------------|
| CzSO            | 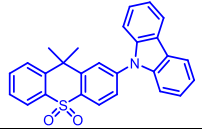   | 440 nm                | 453 ms              | 26.3%               | 490 nm                     | Intermolecular through-space CT between Cz and SO unit      | This work  |
| $\beta$ -CbSO   |    | 440 nm                | 419                 | 4.4%                | 460 nm                     | Intermolecular through space CT between beta-Cb and SO unit | This work  |
| Cz              |    | 365 nm                | 910 or 470 ms       | -                   | 555 nm                     | Cz aggregates                                               | [2]<br>[3] |
| C1              |    | 365 nm                | 220 ms              | -                   | ~550 nm                    | Cz aggregates                                               | [4]        |
| C3              |   | 365 nm                | 810 ms              | -                   | ~550 nm                    | Cz aggregates                                               | [4]        |
| C4              |  | 365 nm                | 490 ms              | -                   | ~560 nm                    | Cz aggregates                                               | [4]        |
| CC2Br           |  | 365 nm                | 160 ms              | 1.6%                | ~550 nm                    | Cz aggregates                                               | [3]        |
| CC4PhBr         |  | 365 nm                | 340 ms              | 9.5%                | ~555 nm                    | Cz aggregates                                               | [3]        |
| CC5PhBr         |  | 365 nm                | 197 ms              | 2.8%                | ~555 nm                    | Cz aggregates                                               | [3]        |
| CC6PhBr         |  | 365 nm                | 200 ms              | 39.5%               | ~555 nm                    | Cz aggregates                                               | [3]        |
| CZEO            |  | 364 nm                | 740 ms              | -                   | 551 nm                     | Cz aggregates                                               | [5]        |
| C-C4-Br         |  | 365 nm                | 140 ms              | 11%                 | 570/620 nm                 | Cz aggregates                                               | [6]        |
| <i>p</i> BrPhCz |  | 400 nm                | 250ms               | 9.5%                | 550/598 nm                 | Cz aggregates                                               | [7]        |
| <i>m</i> BrPhCz |  | 400 nm                | 240 ms              | 6.6%                | 548/598 nm                 | Cz aggregates                                               | [7]        |

|          |                                                                                     |                        |         |       |            |               |      |
|----------|-------------------------------------------------------------------------------------|------------------------|---------|-------|------------|---------------|------|
| PhCz     | 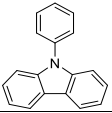   | 400 nm                 | 270 ms  | 1.8%  | 548/596 nm | Cz aggregates | [7]  |
| pCNPhCz  |    | 365 nm<br>or<br>405 nm | 920 ms  | 1.8%  | 545/594 nm | Cz aggregates | [8]  |
| mCNPhCz  |    | 365 nm                 | 810 ms  | 3.7%  | 548/599 nm | Cz aggregates | [8]  |
| oCNPhCz  |    | 365 nm                 | 650 ms  | 2.9%  | 543/593 nm | Cz aggregates | [8]  |
| DCNPhCz  |    | 365 nm                 | 480 ms  | 8.6%  | 544/593 nm | Cz aggregates | [8]  |
| PDCz     |    | 365 nm                 | 560 ms  | 2.5%  | 558 nm     | Cz aggregates | [9]  |
| PDBCz    |   | 365 nm                 | 217 ms  | 38.1% | 546 nm     | Cz aggregates | [9]  |
| CZ-DBF   |  | 365 nm                 | 650 ms  | 14.3% | 550 nm     | Cz aggregates | [10] |
| CZ-DBFBr |  | 365 nm                 | 540 ms  | 41.2% | 550 nm     | Cz aggregates | [10] |
| CZ-DBT   |  | 365 nm                 | 450 ms  | 10.1% | 550 nm     | Cz aggregates | [10] |
| CZ-DBTBr |  | 365 nm                 | 420 ms  | 12.1% | 550 nm     | Cz aggregates | [10] |
| DCzCT    |  | 365 nm                 | 651 ms  | 9.7%  | 546 nm     | Cz aggregates | [11] |
| DCzOT    |  | 365 nm                 | 789 ms  | 9.2%  | 543 nm     | Cz aggregates | [11] |
| DCzNT    |  | 365 nm                 | 633 ms  | 15.4% | 553 nm     | Cz aggregates | [11] |
| DECzT    |  | 365 nm                 | 1350 ms | 0.6%  | 529/574 nm | Cz aggregates | [12] |

|         |  |        |         |       |                |               |      |
|---------|--|--------|---------|-------|----------------|---------------|------|
| DPhCzT  |  | 365 nm | 1060 ms | 1.25% | 530/575 nm     | Cz aggregates | [12] |
| CzDCIT  |  | 365 nm | 490 ms  | 2.1%  | 543/591 nm     | Cz aggregates | [12] |
| p-BrTCz |  | 365 nm | 155 ms  | 7.7%  | 539/581/634 nm | Cz aggregates | [13] |
| m-BrTCz |  | 365 nm | 109 ms  | 13%   | 530/572/622 nm | Cz aggregates | [13] |
| o-BrTCz |  | 365 nm | 156 ms  | 2.3%  | 532/573/624 nm | Cz aggregates | [13] |
| MCzT    |  | 365 nm | 1131 ms | 2.5%  | 538/572 nm     | Cz aggregates | [14] |
| ECzT    |  | 365 nm | 1281 ms | -     | 537/570 nm     | Cz aggregates | [14] |
| PCzT    |  | 365 nm | 146 ms  | 1.8%  | 528/570 nm     | Cz aggregates | [14] |
| BCzT    |  | 365 nm | 102 ms  | 1.1%  | 530/570 nm     | Cz aggregates | [14] |
| FCzT    |  | 365 nm | 1228 ms | 0.8%  | 526/573 nm     | Cz aggregates | [14] |
| SPCzT   |  | 365 nm | 420 ms  | 0.58% | 539/580 nm     | Cz aggregates | [15] |
| MTOD    |  | 365 nm | 861 ms  | -     | 556 nm         | Cz aggregates | [16] |
| DNCzP   |  | 365 nm | 230 ms  | 0.08% | 587/644 nm     | Cz aggregates | [17] |
| DNCzPO  |  | 365 nm | 670 ms  | 2.8%  | 537/582/634 nm | Cz aggregates | [17] |

|                     |                                                                                     |                      |         |       |                   |                                                                              |      |
|---------------------|-------------------------------------------------------------------------------------|----------------------|---------|-------|-------------------|------------------------------------------------------------------------------|------|
| DNCzPS              | 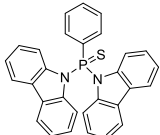   | 365 nm               | 510 ms  | 4.0%  | 530/577/627 nm    | Cz aggregates                                                                | [17] |
| PhCz                |    | 376 nm               | 646 ms  | 0.7%  | 530/570 nm        | Cz aggregates                                                                | [18] |
| CPhCz               |    | 410 nm               | 847 ms  | 8.3%  | 530/570 nm        | Cz aggregates                                                                | [18] |
| BPhCz               |    | 388 nm               | 667 ms  | 3.4%  | 530/570 nm        | Cz aggregates                                                                | [18] |
| 24CPhCz             |    | 365 nm               | 1058 ms | 2.5%  | 532/574 nm        | Cz aggregates                                                                | [19] |
| 34CPhCz             |    | 365 nm               | 770 ms  | 3.4%  | 537/582/636 nm    | Cz aggregates                                                                | [19] |
| DCED                |    | 365 nm               | 296 ms  | 3.5%  | 529/572/623 nm    | Cz aggregates                                                                | [20] |
| o-PBCM              |   | 365 nm               | 344 ms  | 10.2% | 529/572/623 nm    | Cz aggregates                                                                | [20] |
| m-PBCM              |  | 365 nm               | 711 ms  | 5.7%  | 529/572/623 nm    | Cz aggregates                                                                | [20] |
| p-PBCM              |  | 365 nm               | 312 ms  | 9.8%  | 529/572/623 nm    | Cz aggregates                                                                | [20] |
| BCz-BP              |  | 365 nm               | 280 ms  | 5.0%  | 549/602 nm        | Cz aggregates                                                                | [21] |
| CZBP<br>2015.9 tang |  | 365 nm               | 518 ms  | 1.40% | 552/569/597 nm    | Cz aggregates                                                                | [22] |
| o-Cz                |  | UV and visible light | 840 ms  | 16.6% | 472 nm/<br>542 nm | Emission from intramolecular through-space charge-transfer and Cz aggregates | [23] |
| CPM                 |  | 365 nm               | 748 ms  | 3.17% | 530 nm            | Cz aggregates                                                                | [24] |
| CMPM                |  | 365 nm               | 340 ms  | 1.98% | 530 nm            | Cz aggregates                                                                | [24] |



|         |                                                                                     |                      |        |       |            |               |      |
|---------|-------------------------------------------------------------------------------------|----------------------|--------|-------|------------|---------------|------|
| CMOPM   | 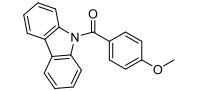   | 365 nm               | 114 ms | 0.51% | 550 nm     | Cz aggregates | [24] |
| CBA     |    | 360 nm               | 540 ms | -     | 550 nm     | Cz aggregates | [25] |
| ICA     |    | 350 nm               | 373 ms | -     | 553/600 nm | Cz aggregates | [26] |
| p-1     |    | UV and visible light | 153 ms | 7.1%  | 569 nm     | Cz aggregates | [27] |
| m-1     |    | UV and visible light | 134 ms | 0.9%  | 565 nm     | Cz aggregates | [27] |
| p-2     |    | UV and visible light | 666 ms | 2%    | 553 nm     | Cz aggregates | [27] |
| m-2     |    | UV and visible light | 385 ms | 4%    | 547 nm     | Cz aggregates | [27] |
| DME     |    | 365 nm               | 430 ms | -     | 545 nm     | Cz aggregates | [28] |
| PE      |    | 365 nm               | 264 ms | -     | 553 nm     | Cz aggregates | [28] |
| o-MCBA  |   | 365 nm               | 619 ms | 2.0%  | 550/600 nm | Cz aggregates | [29] |
| m-MCBA  |  | 365 nm               | 795 ms | 2.1%  | 545/595 nm | Cz aggregates | [29] |
| p-MCBA  |  | 365 nm               | 129 ms | 1.2%  | 560/590 nm | Cz aggregates | [29] |
| 2-BACZ  |  | 365 nm               | 568 ms | 2.6%  | 558/599 nm | Cz aggregates | [30] |
| 3-BACZ  |  | 365 nm               | 602 ms | 3.4%  | 546/592 nm | Cz aggregates | [30] |
| 4-BACZ  |  | 365 nm               | 558 ms | 6.9%  | 549/594 nm | Cz aggregates | [30] |
| BCz-DPS |  | 365 nm               | 120 ms | 6.0%  | 558 nm     | Cz aggregates | [21] |

|          |  |        |        |      |            |                                              |      |
|----------|--|--------|--------|------|------------|----------------------------------------------|------|
| 0M       |  | 365 nm | 360 ms | 1.5% | 565 nm     | Cz aggregates                                | [31] |
| 1M       |  | 365 nm | 820 ms | 2.6% | 546 nm     | Cz aggregates                                | [31] |
| 3M       |  | 365 nm | 830 ms | 1.1% | 542 nm     | Cz aggregates                                | [31] |
| CzDPS    |  | UV     | 465 ms | 0.2% | 565 nm     | Cz aggregates                                | [32] |
| OMe-SPhT |  | 365 nm | 171 ms | 4.7% | 563 nm     | PhT                                          | [33] |
| DOPPMO   |  | 365 nm | 455 ms | 3.6% | 488 nm     | -                                            | [34] |
| PEO      |  | 365 nm | 238 ms | 8.1% | 521 nm     | -                                            | [34] |
| DOPEO    |  | 365 nm | 876 ms | 8.2% | 514 nm     | -                                            | [34] |
| CS-H     |  | 365 nm | 188 ms | -    | 525 nm     | -                                            | [35] |
| CS-Br    |  | 365 nm | 268 ms | -    | 525 nm     | -                                            | [35] |
| CS-Cl    |  | 365 nm | 256 ms | -    | 500 nm     | -                                            | [35] |
| CS-F     |  | 365 nm | 410 ms | -    | 483/513 nm | -                                            | [35] |
| CS-CF3   |  | 365 nm | 299 ms | -    | 480/510 nm | -                                            | [35] |
| CS-CH3   |  | 365 nm | 245 ms | -    | ~520 nm    | Stacking of phenothiazine 5,5-dioxide groups | [36] |

|                       |  |            |         |      |            |                                              |      |
|-----------------------|--|------------|---------|------|------------|----------------------------------------------|------|
| CS-C3H7               |  | 365 nm     | 327 ms  | -    | ~520 nm    | Stacking of phenothiazine 5,5-dioxide groups | [36] |
| CS-C4H9               |  | 365 nm     | 181 ms  | -    | ~520 nm    | Stacking of phenothiazine 5,5-dioxide groups | [36] |
| CS-C5H11              |  | 365 nm     | 205 ms  | -    | ~520 nm    | Stacking of phenothiazine 5,5-dioxide groups | [36] |
| CzS-CN                |  | 365 nm     | 226 ms  | -    | 521 nm     | -                                            | [37] |
| Id                    |  | 365 nm     | 402 ms  | -    | 525 nm     | H-aggregation                                | [2]  |
| DEOPh                 |  | 254 nm     | 710 ms  | 0.3% | 515/547 nm | H-aggregation                                | [12] |
| IPA                   |  | 340-400 nm | 290 ms  | -    | 494 nm     | -                                            | [38] |
| 24FPB                 |  | 365 nm     | 2500 ms | 2.4% | 515 nm     | H-aggregation                                | [39] |
| 2FPB                  |  | 365 nm     | 920 ms  | 1.0% | 482 nm     | -                                            | [39] |
| 234FPB                |  | 365 nm     | 490 ms  | 0.2% | 470 nm     | -                                            | [39] |
| PBA-MeO               |  | 295 nm     | 2240 ms | -    | 483 nm     | effective $\pi$ - $\pi$ stacking             | [40] |
| PBA-F                 |  | 280 nm     | 1340 ms | -    | 492 nm     | -                                            | [40] |
| tPBA-MeO              |  | 301 nm     | 710 ms  | -    | 503 nm     | -                                            | [40] |
| tPBA-F                |  | 280 nm     | 1960 ms | -    | 500 nm     | -                                            | [40] |
| PDBEG                 |  | 254 nm     | 1600 ms | -    | 503 nm     | -                                            | [41] |
| 1                     |  | 254 nm     | 1850 ms | 2%   | 460/500 nm | -                                            | [42] |
| TPB <sup>a)</sup>     |  | 365 nm     | 700 ms  | 4.6% | 521 nm     | -                                            | [43] |
| BipyDpa <sup>a)</sup> |  | 365 nm     | 176 ms  | <1%  | 542 nm     | -                                            | [43] |
| PhenDpa <sup>a)</sup> |  | 365 nm     | 330 ms  | 5.7% | 516 nm     | -                                            | [43] |

|                         |  |        |         |       |                |                                                                                                  |      |
|-------------------------|--|--------|---------|-------|----------------|--------------------------------------------------------------------------------------------------|------|
| PhenTpa <sup>a)</sup>   |  | 365 nm | 680 ms  | 1.2%  | 544 nm         | -                                                                                                | [43] |
| 8                       |  | 340 nm | 380 ms  | 5.6%  | 566 nm         | the non-planar configuration allows for pronounced SOC and a high triplet energy                 | [44] |
| PNA <sup>b)</sup>       |  | 365 nm | 173 ms  | 17%   | 508/546/589 nm | guest-host doping                                                                                | [45] |
| AN-MA                   |  | 365 nm | 1584 ms | -     | 490 nm         | Intramolecular through-space conjugation                                                         | [46] |
| a                       |  | 365 nm | 243 ms  | 0.8%  | 553 nm         | minimizes intermolecular interactions to reduce non-radiative decay pathways in the solid state. | [47] |
| b                       |  | 365 nm | 371 ms  | 3.5%  | 548 nm         | minimizes intermolecular interactions to reduce non-radiative decay pathways in the solid state. | [47] |
| PBC <sup>c)</sup>       |  | 366 nm | 2620 ms | 9.7%  | 510 nm         | host-guest complexation                                                                          | [48] |
| PCC <sup>c)</sup>       |  | 370 nm | 275 ms  | 26.7% | 500 nm         | host-guest complexation                                                                          | [48] |
| (R)-DMBDA <sup>d)</sup> |  | 360 nm | 670 ms  | 2.3%  | 560 nm         | -                                                                                                | [49] |
| 1                       |  | 350 nm | 990 ms  | -     | 525 nm         | H-aggregation                                                                                    | [50] |
| POP                     |  | 365 nm | 253 ms  | 5.6%  | 520 nm         | -                                                                                                | [51] |
| TOP                     |  | 365 nm | 248 ms  | 0.5%  | 473 nm         | -                                                                                                | [51] |
| DMOT                    |  | 290 nm | 2452 ms | 7.2%  | 430 nm         | H-aggregation                                                                                    | [52] |
|                         |  | 340 nm | 1638 ms |       | 470 nm         |                                                                                                  |      |
| TMOT                    |  | 320 nm | 582 ms  | 31.2% | 465 nm         | H-aggregation                                                                                    | [52] |
|                         |  | 365 nm | 745 ms  |       | 505 nm         |                                                                                                  |      |
| MOPT                    |  | 270 nm | 137 ms  | 0.2%  | 370 nm         | H-aggregation                                                                                    | [52] |
|                         |  | 360 nm | 544 ms  |       | 521 nm         |                                                                                                  |      |
| CYAD                    |  | 270 nm | 453 ms  | 14.2% | 380 nm         | H-aggregation                                                                                    | [52] |
|                         |  | 330 nm | 552 ms  |       | 450 nm         |                                                                                                  |      |

|     |                        |        |        |      |        |                             |      |
|-----|------------------------|--------|--------|------|--------|-----------------------------|------|
| CAA | CNCH <sub>2</sub> COOH | 365 nm | 862 ms | 2.1% | 506 nm | intermolecular interactions | [53] |
|-----|------------------------|--------|--------|------|--------|-----------------------------|------|

<sup>a)</sup> Doped in PMMA of 2 wt.%. (rigid matrix host-guest system); <sup>b)</sup> Doped in DBBP; <sup>c)</sup> Host-guest complexation, cucurbit [6]uril (CB[6]) as host; <sup>d)</sup> Doped in  $\beta$ -estradiol (vide Scheme S2).

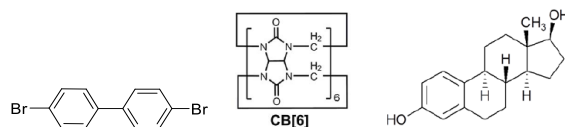

**Scheme S2.** Molecular structures of DBBP, CB[6] and  $\beta$ -estradiol.

#### 4) References

- [1] a) P. L. Santos, J. S. Ward, P. Data, A. S. Batsanov, M. R. Bryce, F. B. Dias, A. P. Monkman, *J. Mater. Chem. C* **2016**, *4*, 3815-3824; b) C. Fu, S. Luo, Z. Li, X. Ai, Z. Pang, C. Li, K. Chen, L. Zhou, F. Li, Y. Huang, Z. Lu, *Chem. Commun.* **2019**, *55*, 6317-6320.
- [2] C. Sun, X. Ran, X. Wang, Z. Cheng, Q. Wu, S. Cai, L. Gu, N. Gan, H. Shi, Z. An, H. Shi, W. Huang, *J. Phys. Chem. Lett.* **2018**, *9*, 335-339.
- [3] P. Xue, P. Wang, P. Chen, B. Yao, P. Gong, J. Sun, Z. Zhang, R. Lu, *Chem. Sci.* **2017**, *8*, 6060-6065.
- [4] Z. Zhang, L. Tang, X. Fan, Y. Wang, K. Zhang, Q. Sun, H. Zhang, S. Xue, W. Yang, *J. Mater. Chem. C* **2018**, *6*, 8984-8989.
- [5] Q. Huang, X. Mei, Z. Xie, D. Wu, S. Yang, W. Gong, Z. Chi, Z. Lin, Q. Ling, *J. Mater. Chem. C* **2019**, *7*, 2530-2534.
- [6] S. M. A. Fateminia, Z. Mao, S. Xu, Z. Yang, Z. Chi, B. Liu, *Angew. Chem. Int. Ed.* **2017**, *56*, 12160-12164.
- [7] J. Yuan, R. Chen, X. Tang, Y. Tao, S. Xu, L. Jin, C. Chen, X. Zhou, C. Zheng, W. Huang, *Chem. Sci.* **2019**, *10*, 5031-5038.
- [8] J. Yuan, S. Wang, Y. Ji, R. Chen, Q. Zhu, Y. Wang, C. Zheng, Y. Tao, Q. Fan, W. Huang, *Mater. Horiz.* **2019**, *6*, 1259-1264.
- [9] H. Shi, L. Song, H. Ma, C. Sun, K. Huang, A. Lv, W. Ye, H. Wang, S. Cai, W. Yao, Y. Zhang, R. Zheng, Z. An, W. Huang, *J. Phys. Chem. Lett.* **2019**, *10*, 595-600.
- [10] W. Zhao, T. S. Cheung, N. Jiang, W. Huang, J. W. Y. Lam, X. Zhang, Z. He, B. Z. Tang, *Nat. Commun.* **2019**, *10*, 1595.
- [11] L. Gu, H. Shi, C. Miao, Q. Wu, Z. Cheng, S. Cai, M. Gu, C. Ma, W. Yao, Y. Gao, Z. An, W. Huang, *J. Mater. Chem. C* **2018**, *6*, 226-233.
- [12] Z. An, C. Zheng, Y. Tao, R. Chen, H. Shi, T. Chen, Z. Wang, H. Li, R. Deng, X. Liu, W. Huang, *Nat. Mater.* **2015**, *14*, 685-690.
- [13] S. Cai, H. Shi, D. Tian, H. Ma, Z. Cheng, Q. Wu, M. Gu, L. Huang, Z. An, Q. Peng, W. Huang, *Adv. Funct. Mater.* **2018**, *28*.
- [14] L. Gu, H. Shi, M. Gu, K. Ling, H. Ma, S. Cai, L. Song, C. Ma, H. Li, G. Xing, X. Hang, J. Li, Y. Gao, W. Yao, Z. Shuai, Z. An, X. Liu, W. Huang, *Angew. Chem. Int. Ed.* **2018**, *57*, 8425-8431.
- [15] C. Ma, H. Ma, K. Ling, R. Zheng, M. Gu, L. Song, Z. An, H. Shi, W. Huang, *J. Mater. Chem. C* **2018**, *6*, 10179-10183.
- [16] Z. Niu, C. Ma, W. Ye, H. Wang, W. Jia, H. Shi, H. Shi, Z. An, W. Huang, *RSC Adv.* **2019**, *9*, 19075-19078.
- [17] Y. Tao, R. Chen, H. Li, J. Yuan, Y. Wan, H. Jiang, C. Chen, Y. Si, C. Zheng, B. Yang, G. Xing, W. Huang, *Adv. Mater.* **2018**, *30*, 1803856.
- [18] S. Cai, H. Shi, J. Li, L. Gu, Y. Ni, Z. Cheng, S. Wang, W. W. Xiong, L. Li, Z. An, W. Huang, *Adv. Mater.* **2017**, *29*, 1701244.
- [19] N. Gan, X. Wang, H. Ma, A. Lv, H. Wang, Q. Wang, M. Gu, S. Cai, Y. Zhang, L. Fu, M. Zhang, C. Dong, W. Yao, H. Shi, Z. An, W. Huang, *Angew. Chem. Int. Ed.* **2019**, *131*, 14278-14283.
- [20] Z. He, H. Gao, S. Zhang, S. Zheng, Y. Wang, Z. Zhao, D. Ding, B. Yang, Y. Zhang, W. Z. Yuan, *Adv. Mater.* **2019**, *31*, 1807222.
- [21] Z. Yang, Z. Mao, X. Zhang, D. Ou, Y. Mu, Y. Zhang, C. Zhao, S. Liu, Z. Chi, J. Xu, Y. C. Wu, P. Y.

- Lu, A. Lien, M. R. Bryce, *Angew. Chem. Int. Ed.* **2016**, *55*, 2181-2185.
- [22] Y. Gong, G. Chen, Q. Peng, W. Z. Yuan, Y. Xie, S. Li, Y. Zhang, B. Z. Tang, *Adv. Mater.* **2015**, *27*, 6195-6201.
- [23] Z. Mao, Z. Yang, C. Xu, Z. Xie, L. Jiang, F. L. Gu, J. Zhao, Y. Zhang, M. P. Aldred, Z. Chi, *Chem. Sci.* **2019**, *10*, 7352-7357.
- [24] Y. Xie, Y. Ge, Q. Peng, C. Li, Q. Li, Z. Li, *Adv. Mater.* **2017**, *29*, 1606829.
- [25] P. Xue, J. Sun, P. Chen, P. Wang, B. Yao, P. Gong, Z. Zhang, R. Lu, *Chem. Commun.* **2015**, *51*, 10381-10384.
- [26] C. Li, X. Tang, L. Zhang, C. Li, Z. Liu, Z. Bo, Y. Q. Dong, Y.-H. Tian, Y. Dong, B. Z. Tang, *Adv. Optical Mater.* **2015**, *3*, 1184-1190.
- [27] D. Tu, S. Cai, C. Fernandez, H. Ma, X. Wang, H. Wang, C. Ma, H. Yan, C. Lu, Z. An, *Angew. Chem. Int. Ed.* **2019**, *58*, 9129-9133.
- [28] K. Zhang, Q. Sun, L. Tang, Y. Wang, X. Fan, L. Liu, S. Xue, W. Yang, *J. Mater. Chem. C* **2018**, *6*, 8733-8737.
- [29] Y. Xiong, Z. Zhao, W. Zhao, H. Ma, Q. Peng, Z. He, X. Zhang, Y. Chen, X. He, J. W. Y. Lam, B. Z. Tang, *Angew. Chem. Int. Ed.* **2018**, *57*, 7997-8001.
- [30] T. Zhang, H. Gao, A. Lv, Z. Wang, Y. Gong, D. Ding, H. Ma, Y. Zhang, W. Z. Yuan, *J. Mater. Chem. C* **2019**, *7*, 9095-9101.
- [31] Z. Mao, Z. Yang, Z. Fan, E. Ubba, W. Li, Y. Li, J. Zhao, Z. Yang, M. P. Aldred, Z. Chi, *Chem. Sci.* **2019**, *10*, 179-184.
- [32] D. Tian, Z. Zhu, L. Xu, H. Cong, J. Zhu, *Mater. Horiz.* **2019**, *6*, 1215-1221.
- [33] J. Chen, N. U. Rahman, Z. Mao, J. Zhao, Z. Yang, S. Liu, Y. Zhang, Z. Chi, *J. Mater. Chem. C* **2019**, *7*, 8250-8254.
- [34] S. Tian, H. Ma, X. Wang, A. Lv, H. Shi, Y. Geng, J. Li, F. Liang, Z. M. Su, Z. An, W. Huang, *Angew. Chem. Int. Ed.* **2019**, *58*, 6645-6649.
- [35] J. Yang, X. Zhen, B. Wang, X. Gao, Z. Ren, J. Wang, Y. Xie, J. Li, Q. Peng, K. Pu, Z. Li, *Nat. Commun.* **2018**, *9*, 840.
- [36] J. Yang, H. Gao, Y. Wang, Y. Yu, Y. Gong, M. Fang, D. Ding, W. Hu, B. Z. Tang, Z. Li, *Mater. Chem. Front.* **2019**, *3*, 1391-1397.
- [37] J. Yang, Z. Ren, B. Chen, M. Fang, Z. Zhao, B. Z. Tang, Q. Peng, Z. Li, *J. Mater. Chem. C* **2017**, *5*, 9242-9246.
- [38] S. Kuno, H. Akeno, H. Ohtani, H. Yuasa, *Phys. Chem. Chem. Phys.* **2015**, *17*, 15989-15995.
- [39] M. Li, K. Ling, H. Shi, N. Gan, L. Song, S. Cai, Z. Cheng, L. Gu, X. Wang, C. Ma, M. Gu, Q. Wu, L. Bian, M. Liu, Z. An, H. Ma, W. Huang, *Adv. Optical Mater.* **2019**, *7*, 1800820.
- [40] Z. Chai, C. Wang, J. Wang, F. Liu, Y. Xie, Y. Z. Zhang, J. R. Li, Q. Li, Z. Li, *Chem. Sci.* **2017**, *8*, 8336-8344.
- [41] S. Kuno, T. Kanamori, Z. Yijing, H. Ohtani, H. Yuasa, *ChemPhotoChem* **2017**, *1*, 102-106.
- [42] Y. Shoji, Y. Ikabata, Q. Wang, D. Nemoto, A. Sakamoto, N. Tanaka, J. Seino, H. Nakai, T. Fukushima, *J. Am. Chem. Soc.* **2017**, *139*, 2728-2733.
- [43] M. Louis, H. Thomas, M. Gmelch, A. Haft, F. Fries, S. Reineke, *Adv. Mater.* **2019**, *31*, 1807887.
- [44] C. A. M. Salla, G. Farias, M. Rouzieres, P. Dechambenoit, F. Durola, H. Bock, B. de Souza, I. H. Bechtold, *Angew. Chem. Int. Ed.* **2019**, *58*, 6982-6986.
- [45] J. Wei, B. Liang, R. Duan, Z. Cheng, C. Li, T. Zhou, Y. Yi, Y. Wang, *Angew. Chem. Int. Ed.* **2016**, *55*, 15589-15593.
- [46] T. Zhang, Z. Zhao, H. Ma, Y. Zhang, W. Z. Yuan, *Chem. Asian J.* **2019**, *14*, 884-889.
- [47] B. Chen, X. Zhang, Y. Wang, H. Miao, G. Zhang, *Chem. Asian J.* **2019**, *14*, 751-754.
- [48] Z.-Y. Zhang, Y. Liu, *Chem. Sci.* **2019**, *10*, 7773-7778.
- [49] S. Hirata, M. Vacha, *J. Phys. Chem. Lett.* **2016**, *7*, 1539-1545.
- [50] E. Lucenti, A. Forni, C. Botta, L. Carlucci, C. Giannini, D. Marinotto, A. Previtali, S. Righetto, E. Cariati, *J. Phys. Chem. Lett.* **2017**, *8*, 1894-1898.
- [51] H. Bhatia, I. Bhattacharjee, D. Ray, *J. Phys. Chem. Lett.* **2018**, *9*, 3808-3813.
- [52] L. Gu, H. Shi, L. Bian, M. Gu, K. Ling, X. Wang, H. Ma, S. Cai, W. Ning, L. Fu, H. Wang, S. Wang, Y. Gao, W. Yao, F. Huo, Y. Tao, Z. An, X. Liu, W. Huang, *nature photon.* **2019**, *13*, 406-411.
- [53] M. Fang, J. Yang, X. Xiang, Y. Xie, Y. Dong, Q. Peng, Q. Li, Z. Li, *Mater. Chem. Front.* **2018**, *2*, 2124-2129.
